# Andropause: Clinical Implications of the Decline in Serum Testosterone Levels With Aging in Men

Alvin M. Matsumoto

Department of Medicine, Division of Gerontology and Geriatric Medicine, Population Center for Research in Reproduction, University of Washington School of Medicine, and Geriatric Research, Education and Clinical Center, Clinical Research Unit, V.A. Puget Sound Health Care System, Seattle.

IT is now well accepted that serum testosterone (T) levels decline progressively with aging in men (1–5). This decline is associated with alterations in body composition; diminished energy, muscle strength, and physical function; reduced sexual function; depressed mood; and decreased cognitive function. Similar changes occur in young men with androgen deficiency and are improved with T replacement therapy. However, the physiological and clinical significance of the aging-associated decline in serum T levels in men is unclear, particularly because T levels may remain within the normal range for young men. From a practical clinical standpoint, it is most appropriate to define “andropause” as an age-related decline in serum T levels in older men to below the normal range in young men that is associated with a clinical syndrome (i.e., symptoms and signs) consistent with androgen deficiency. The decline in T levels is a consequence both of aging per se and age-associated comorbid illnesses and medications that are used to treat them (6–13). However, regardless of the etiology, androgen deficiency may contribute, at least in part, to age-related decrements in physiological function and may be associated with a clinical syndrome.

Andropause has also been referred to by some as “androgen deficiency in the aging male (ADAM),” “partial androgen deficiency in the aging male (PADAM),” or “aging-associated androgen deficiency (AAAD).” The term “male menopause” is inappropriate because there is no interruption or cessation of menses, and “viropause” is inaccurate because there is no loss of virilization. “Male climacteric” refers to the syndrome of endocrine, somatic, and psychic changes that occur in normal men with aging. This term emphasizes the multidimensional nature of age-related changes, including decreases in other hormones such as growth hormone (GH), insulin-like growth factor-1 (IGF-1), dehydroepiandrosterone (DHEA), and melatonin (1,14–17), but it does not relate aspects of the male aging syndrome specifically with androgen levels. The term “andropause” is not completely accurate because androgen secretion does not cease altogether. However, because it is the only term that relates the syndrome of age-related physiological changes with the gradual and progressive decline in T levels that occurs with aging, andropause will be used in this review. Andropause is a term also used commonly by experts in the field and by lay persons because it retains some analogy to menopause in women.

## PHYSIOLOGICAL BASIS OF ANDROPAUSE

### *Age-Related Decline in Serum T Levels*

In both cross-sectional (5,6,18–38) and longitudinal studies (39–42), beginning in the third decade, aging is associated with a gradual and progressive decline in serum T levels at a rate of approximately 1% per year. As a result, ~20% of men older than 60 and ~50% of men older than 80 years of age have serum total T levels below the normal range for young men (39,43,44).

Circulating T is approximately 98% bound to serum proteins, predominantly to sex hormone-binding globulin (SHBG), the major binding protein for T in blood, and albumin (45–47). Only 1% to 2% of T in circulation is completely unbound or free. Because T is bound with high affinity (i.e., tightly) to SHBG, SHBG-bound T is not available to most tissues for action. In contrast, T is bound with low affinity (weakly) to albumin, so both albumin-bound and free T are bioavailable to most tissues for action. Because the concentration of SHBG increases with aging, serum-free T and bioavailable T (free plus albumin-bound T) concentrations decline more markedly than total T levels with aging (13, 16,20,24,26,27,29,31,33,36,39,41,48). Therefore, a much larger percentage of older men have levels of these biologically active fractions of circulating T below the normal range for young men (39,49).

Age-related and other alterations in SHBG have important practical clinical implications in the diagnosis of androgen deficiency. Because total T assays measure both free T and T bound to SHBG and albumin, alterations in SHBG and/or albumin result in changes in total T levels in the same direction. Measurements of bioavailable or free T are not affected by alterations in SHBG. Therefore, they provide a better assessment of biologically active T in blood, especially in common clinical states such as aging in which SHBG increases or moderate obesity in which SHBG decreases (47,50–52).

Because SHBG levels increase with aging, many older men with low-normal total T levels have free or bioavailable T levels that are below the normal range for young men. Therefore, measurements of bioavailable or free T using ammonium sulfate precipitation or equilibrium dialysis, respectively, or calculated from measurements of total T and SHBG are recommended to diagnose androgen deficiency in older men. Unfortunately, these measurements of

free and bioavailable T are not usually performed in local laboratories and are only available through commercial reference laboratories. Most local laboratories measure free T using a solid-phase direct analog immunoassay kit. Although free T measurements using this method correlate with those using equilibrium dialysis, values obtained differ substantially [e.g., by more than an order of magnitude in women (53)] from those obtained by equilibrium dialysis or calculated from SHBG, and vary directly with alterations in SHBG levels (52–56). Therefore, free T measurements using direct analog immunoassay kits may not provide useful clinical information beyond that of total T levels. They tend to underdiagnose older men with androgen deficiency and overdiagnose androgen deficiency in men with low SHBG levels (e.g., moderately obese men). Free T levels measured using a direct analog immunoassay should not be used in situations where SHBG levels may be altered (e.g., older men).

#### *Decline in Both Testis Function and Hypothalamic GnRH Regulation With Aging*

The decline in serum T levels with aging is due both to impaired testis production of T and hypothalamic secretion of gonadotropin-releasing hormone (GnRH) resulting in inadequate stimulation of luteinizing hormone (LH) secretion by the pituitary gland.

Older men demonstrate a decrease in the number of Leydig cells (57–59), the cells of the testis that produce T, reduction in basal T production (60,61), and marked decreased in T secretion by the testis in response to maximal stimulation by administration of human chorionic gonadotropin (hCG), an LH-like hormone (62–66). The impact of reduced T production on circulating T levels is lessened by the decrease in metabolic clearance of T that also occurs with aging (35). The normal circadian variation in serum T levels with peak concentrations in the morning is blunted in healthy older men compared to young men (65,67–72), suggesting an alteration in the hypothalamic circadian pacemaker function. Because of age-related blunting of the normal circadian variation in T levels, early morning serum T levels are lower but late afternoon values are more similar in older compared with young men (23).

Function of the seminiferous tubule compartment of the testis also declines with aging. In older compared with young men, spermatogenesis assessed histologically is reduced (58,73,74), but ejaculated sperm concentration is unchanged or increased as a result of diminished ejaculatory volume and frequency (28,75). The number of sperm with normal motility and morphology also decreases but in vitro fertilizing capacity is relatively well preserved in older men (28,76). Despite overall well-preserved fertility potential (77) and documented instances of paternity in men older than age 90 years, overall fertility rates decline with age (78,79), largely as a result of diminished sexual activity (80). With older paternal age, the risk of inherited autosomal dominant diseases increases in offspring (79,81). The number of Sertoli cells (57,82), seminiferous tubule cells that support spermatogenesis, and serum levels of inhibin B, a Sertoli cell peptide product responsible for feedback inhibition of follicle-stimulating hormone (FSH) secretion from

the pituitary gland, decrease with aging (83,84). Most of the decline of inhibin B levels appears to occur by middle age with stable concentrations from middle to old age.

In both cross-sectional and longitudinal studies, the decline in serum T levels with aging is associated with a gradual increase in serum gonadotropins, FSH, and to a lesser extent, LH concentrations (19,25,41,85–87). Although gonadotropin levels increase with aging, they often remain within the wide normal range for younger men. The resulting hormonal pattern of a low serum T and normal gonadotropin levels suggests concomitant hypothalamic-pituitary dysfunction in conjunction with primary testicular failure in aging men. Low serum T and normal gonadotropin levels, consistent with secondary hypogonadism, are found commonly during the work-up of older men with symptoms of androgen deficiency (see below) (88).

Detailed studies of pulsatile gonadotropin secretion provide indirect evidence for age-related alterations in pulsatile GnRH secretion from the hypothalamus. Compared with normal men, young hypogonadal men with low serum T levels demonstrate an increase in LH pulse frequency and amplitude associated with diminished T negative feedback (89,90). Compared with young men, healthy older men with low serum T levels demonstrate an abnormal LH pulse frequency, reduced LH pulse amplitude, and more disorderly LH secretion, suggesting an age-associated impairment of the hypothalamic GnRH pulse generator (71,91–98). Basal FSH secretion and pulse amplitude increase, but orderly secretion of FSH is maintained in older compared with young men (99–101). Older men also demonstrate an attenuated stimulation of gonadotropin secretion induced by naltrexone or naloxone, opioid receptor antagonists, suggesting altered central nervous system (CNS) endogenous opiate regulation of GnRH secretion with aging (97,102). The sensitivity of gonadotropin suppression to T negative feedback is increased (103–105), and gonadotropin responsiveness to androgen deprivation induced by an androgen receptor antagonist (flutamide) or androgen synthesis inhibitor (ketoconazole) is attenuated in older compared with young men (106,107).

Compared with young men, older men demonstrate slightly diminished gonadotropin responsiveness to acute GnRH (85,87,108–110) but a normal LH response to chronic pulsatile GnRH administration (111), suggesting that pituitary gonadotropin secretion remains intact with aging. Together, these findings suggest that aging is associated with impairments in both testis function and hypothalamic GnRH regulation of gonadotropin secretion.

#### *Age-Related Alterations in Androgen Action and Active Metabolism of T*

Besides the limited studies of T negative feedback mentioned previously, a systematic evaluation of age-related changes in androgen action in androgen-responsive target organs has not been performed. Androgen receptor gene expression in the CA1 region of the hippocampus and the number of androgen receptor binding sites in genital skin are decreased in older compared with young men (112–114). Androgen receptor expression and nuclear androgen receptor levels in the prostate are unchanged in older men with-

out benign prostatic hyperplasia (BPH) and are similar to those in young men (115–117). However, prostate androgen receptor expression is reduced, and nuclear androgen receptor levels are increased in older men with BPH compared with young men.

The length of trinucleotide CAG repeats in the androgen receptor gene is variable and is associated with differences in transcriptional activity, with a shorter CAG repeat length associated with greater androgen receptor activity and possibly overall greater androgen action (118). In the Massachusetts Male Aging Study (MMAS), serum total and free T levels were found to be associated with the CAG repeat length in the androgen receptor gene (40). Older men with lower serum T levels had an androgen receptor genotype characterized by a shorter CAG repeat length, suggesting overall greater androgen activity. It is hypothesized that, in older men with shorter CAG repeat length, increased androgen action at the level of the hypothalamic-pituitary axis may result in greater feedback suppression of gonadotropin and, in turn, endogenous T secretion. This may be an intrinsic mechanism that underlies the physiological decline in serum T levels with aging. A shorter CAG repeat length in the androgen receptor gene also has been associated with an increased risk and severity of BPH and prostate cancer (119–125) and an earlier age at diagnosis and aggressiveness of prostate carcinoma (126–129).

Androgen action is not simply a function of androgen receptor expression in target tissues and CAG repeat length, but involves a complex interaction among androgen ligands such as T, the androgen receptor, and tissue-specific coactivators and corepressors with androgen-response elements in specific genes (130,131). Age-related alterations of the latter and other transcription factors in androgen target tissues and their effects on androgen action have not been investigated. However, the preliminary findings reviewed suggest that, in addition to circulating T levels, age-associated changes in androgen action may play important roles in the alterations of physiological function that occur with normal aging and in the pathophysiology of age-related pathologies.

T is actively metabolized to the potent estrogen, estradiol (E2), by the enzyme aromatase, which is located primarily in adipose tissue, and to 5 alpha-dihydrotestosterone (DHT), a more potent androgen than T, by the enzymes 5 alpha-reductase type 1 and 2, which are located predominantly in skin and the prostate (132–134). Many of the actions of T are mediated, at least in part, by its active metabolites, E2 (e.g., bone, brain, and lipids) and DHT (e.g., prostate). Despite declining T levels, serum total E2 and DHT levels do not change or decrease only slightly with aging (24,26,34,37, 38,135–139). This suggests that, with aging, there is a relative increase in aromatization of T to E2 (perhaps due to increased adipose tissue mass) and 5 alpha-reduction of T to DHT and/or reductions in the metabolic clearance of E2 and DHT. Because serum SHBG levels increase with aging, serum bioavailable or free E2 and DHT levels would be expected to decrease with aging. The physiological significance of bioavailable E2 and DHT is not clear. However, recent studies suggest that bioavailable E2 levels decline with aging and correlate better than T with bone mineral density in men (26,137,139,140).

Serum markers of peripheral androgen action such as 3 alpha-, 17 beta-androstenediol glucuronide (3 alpha-diol G) decrease markedly with aging, suggesting an overall decline in the total circulating androgen pool (24,138,141). Tissue concentrations of DHT decrease within the epithelial compartment and E2 increase within the stromal compartment of the normal and BPH prostate gland with aging, emphasizing the importance of active metabolism of T in androgen target organs and within specific regions of these organs (142–144).

#### *Age-Related Comorbid Illnesses and Medications Suppress Serum T Levels Further*

In addition to the decline in serum T levels associated with healthy aging, age-related comorbid illnesses (e.g., chronic renal, liver, or pulmonary disease, malignancy) increase, and the use of certain medications that are often used to treat these illnesses (e.g., glucocorticoids and CNS-active medications) and malnutrition that is often associated with illness suppress serum T levels even further (11,12,51,145–148). Compared with community-dwelling healthy older men, old men with significant illnesses, such as cancer or stroke, and those in an inpatient rehabilitation unit or nursing home have substantially lower serum T levels (6–10,21). These sicker old men also have a higher prevalence of T levels below the normal range for either healthy young (~60-90%) or older men (~20-30%).

#### *Age-Related Decline in Adrenal Androgens*

Serum concentrations of DHEA, a weak adrenal androgen that is a precursor of T, decline more rapidly and more profoundly than those of T with aging (149–152). This has been referred to as “adrenopause.” However, the physiological significance of circulating DHEA is unclear at this time. Preliminary controlled studies of DHEA treatment failed to demonstrate significant clinical effects in older men and conflicting effects on general well being (149,153–157). Therefore, the term andropause is reserved for the age-related decline in T, the major circulating androgen in blood.

#### *Age-Associated Physiological Changes Consistent With Androgen Deficiency*

Aging is associated with a number of changes in physiological functions, many of which are regulated by androgens. Physiological alterations that are associated with the age-related decline in serum T levels include decreased lean body mass and muscle mass (predominantly in fast twitch type II muscle fibers) (158–174); reduced muscle strength and power (164,175–180); decreased physical function, aerobic capacity, and balance (175,181–187); increased risk of falls and loss of independent living; increased fat mass during middle to old age, in particular increased amounts of visceral adiposity, which is associated with insulin resistance and increased risk of type 2 diabetes mellitus, hypertension, and atherosclerotic vascular disease, followed by stable or decreased fat mass in very old age (159,188–193); decreased bone mineral density (BMD) and increased risk of osteoporosis and fractures (194–201); decreased skin thickness and body hair, and poor wound healing (202,203);

diminished vigor, energy, and general well being; irritability and depressed mood (204); decreased sexual function (reduced libido, sexual activity, and erectile function) (80,205–208); impaired concentration and cognitive function (209,210); sleep disturbances and impaired sleep quality (211,212); and decreased hematopoiesis (213,214).

Similar alterations in physiological function occur in younger hypogonadal men with androgen deficiency and T replacement therapy: increases lean body mass, muscle mass, and strength; decreases body fat mass; improves energy, well being, mood, and libido; increases spontaneous erections during sleep (nocturnal penile tumescence) and induced by sexual thoughts; improves sexual function; and increases erythropoiesis and hematocrit (215–268). Therefore, it is hypothesized that the decline in serum T levels with aging contributes, at least in part, to these age-related alterations in physiological function, especially in older men with serum T levels below the normal range for young men. Although not uniform, most descriptive studies find a correlation between serum T levels and most of these physiological functions, independent of age.

Some descriptive studies find a positive correlation between T levels and lean body mass, and muscle mass and strength in older men (7,139,269), while others do not (269–272), and most studies (273–277) find an inverse correlation between T and total or abdominal fat mass, suggesting a relationship between serum T and age-related alterations in body composition and muscle strength. Furthermore, serum T levels are lower in men with type 2 diabetes mellitus, and low T levels are associated with a higher risk of developing type 2 diabetes (278–282). However, many studies investigating the association of T levels with total or visceral adiposity and diabetes may have been confounded by the use of total or free T assays that were affected by SHBG concentrations, which are significantly lower in moderately obese men (283,284).

Most epidemiological studies find a positive correlation between free T levels within the physiological range and high-density lipoprotein (HDL) cholesterol levels, and an inverse correlation between T concentrations and hypertension, insulin and glucose levels, prothrombotic factors, atherosclerotic vascular disease, and the presence or severity of coronary artery disease (CAD) (31,285–303). In prospective studies, no correlation is found between T levels and CAD disease incidence (285). No studies have reported an association between T and cardiovascular mortality. Therefore, epidemiological studies suggest a protective or neutral rather than an adverse effect of T on heart disease risk.

A relatively weak positive correlation is found between free, bioavailable, or total T levels and BMD and fracture risk in some studies (137,139,273,304–310), but no correlation is found in others (140,311–319). In recent studies, a stronger correlation is found between bioavailable E2 levels and BMD and fracture risk than between T and these outcomes, suggesting that the age-related reduction in bioavailable E2 levels may be a more important determinant of bone loss with aging in men than T levels (139,140,306,308,311,318,320,321). The findings of severe osteoporosis in men with estrogen resistance or deficiency caused by estrogen receptor or aromatase gene mutations, respectively, and an

increase in BMD with E2 treatment in a man with aromatase deficiency provide strong support for a vital importance of E2 in developing and maintaining normal bone mass (322–328). In older men, administration of an aromatase inhibitor increases markers of bone resorption, and E2 replacement in these men decreases markers of bone resorption, suggesting an important role for T to E2 conversion in the prevention of bone resorption (329,330). However, men with androgen resistance caused by androgen receptor gene mutations have reduced BMD, suggesting that androgens also play an important role in the development and maintenance of bone mineral content in men (331–333). The specific roles of T and E2 in regulating bone turnover were investigated recently in older men with T and E2 deficiency (induced by a GnRH agonist plus an aromatase inhibitor) treated with either physiological T or E2 replacement (334). E2 but not T was found to be dominant in preventing bone resorption, whereas both T and E2 were found to be important in maintaining bone formation. Because E2 is derived from aromatization of T, it is likely that the age-related decline in serum E2 levels is related, at least in part, to the reduction in its substrate, T, with aging. Finally, low T levels are a risk factor for hip fractures in older men (335–337).

Most descriptive studies also find significant associations between T levels and aspects of brain function. In a recent study, an inverse correlation was found between bioavailable T and depression score, suggesting a role for T in the regulation of mood (338). The correlation between T levels and libido and sexual activity is weak (339–345), and such an association is not found in some studies (346). This is consistent with the findings that relatively low serum T levels are required to sustain sexual interest and desire (219,347,348). Although androgen deficiency may contribute to sexual dysfunction, it is rarely the only or major cause of erectile dysfunction in older men. Erectile dysfunction is most commonly due to vascular disease, neuropathy, and medications (88,349,350). T levels are associated with sleep efficiency and architecture (351) and inversely with measures of psychosocial stress (352). Finally, a correlation between bioavailable T and general or spatial cognitive function has been reported, suggesting a potentially very important role for T in the maintenance of cognition and memory (353–357).

Given the multifactorial nature of age-related physiological alterations (see below), it is not surprising that there is a relatively weak correlation between serum T levels and these physiological changes that occur with aging. In fact, recent large epidemiological studies suggest that much of the age-associated decline in serum T levels is attributable to age-related comorbid illnesses, medications, and lifestyle (8,13,358–360).

#### *Multifactorial Etiology of Age-Related Physiological Changes*

It would be naïve to assume that age-associated androgen deficiency is the only cause of the physiological changes that occur with aging. As is the case for many geriatric syndromes, the etiology of most age-related alterations in physiological function is multifactorial, and many of the factors

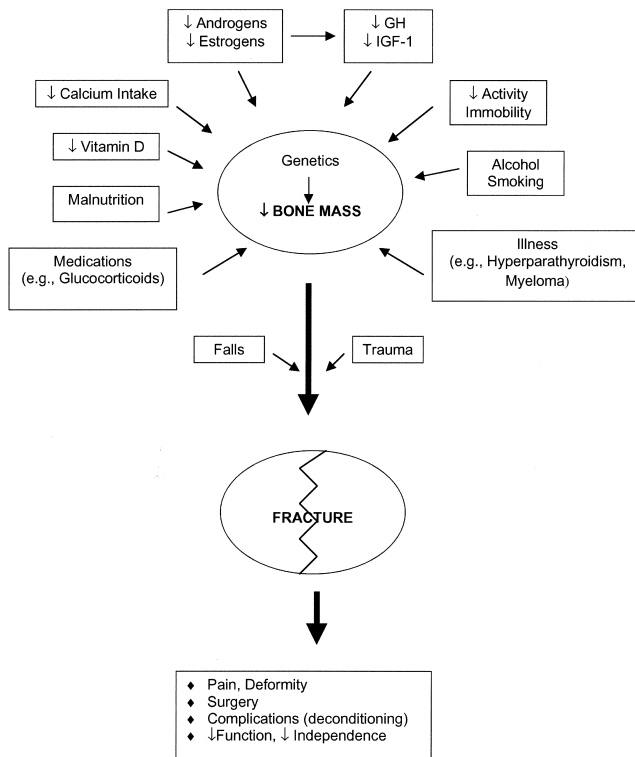

Figure 1. Schematic diagram of the multiple factors that may contribute to decreased bone mass and abnormal bone architecture in older men. These include low free or bioavailable T and E2 levels, low growth hormone (GH) and insulin-like growth factor-1 (IGF-1) concentrations, reduced calcium intake, vitamin D deficiency, malnutrition, use of medications that reduce bone mass (e.g., glucocorticoids, or anticonvulsants), decreased exercise or activity, immobility (e.g., from severe arthritis), lifestyle (excessive alcohol use or tobacco smoking), illnesses that reduce bone mass (e.g., primary or secondary hyperparathyroidism or multiple myeloma), and genetic factors that influence bone metabolism. Reduced bone mass and abnormal bone architecture predispose to fracture following falls or trauma, and fractures may cause significant clinical morbidity and mortality [e.g., pain, deformity, need for surgery, complications (e.g., deconditioning or pneumonia), and loss of function and independence].

that contribute to physiological decline are modifiable or treatable. Therefore, optimal clinical management of these changes requires careful attention to all potential etiological factors. For example (Figure 1), in addition to low T levels, the age-related decrease in BMD and abnormalities in bone architecture may be due to low E2 concentrations; low GH and IGF-1 levels; inadequate calcium intake; vitamin D deficiency; poor nutrition; use of medications (e.g., glucocorticoids or anticonvulsants); lack of exercise or inactivity due to weakness or immobilization (e.g., as a result of severe osteoarthritis); lifestyle (excessive alcohol intake, smoking); age-related illness (e.g., primary and secondary hyperparathyroidism, multiple myeloma); predisposing genetic background; and/or low peak bone mass during puberty and young adulthood as a result of prolonged illness, medications, or delayed puberty (361). The latter two potential etiologies emphasize the need for geriatricians and gerontologists to consider aging as starting from conception and

extending throughout the life span of an individual, not just from young adulthood to old age. Finally, it is important to recognize the essential contribution of falls and trauma to the major clinical consequence of decreased bone mass and abnormal bone architecture, fracture, which may lead to pain, deformity, need for surgery, and associated complications (e.g., deconditioning or pneumonia), and loss of function and independent living.

Interactions among the potential etiological factors that contribute to age-related physiological decline increase the clinical complexity and highlight the importance of using a multifactorial approach in managing older patients. For example, low serum T levels may contribute to reductions in E2, GH, and IGF-1 levels (362), decreased exercise or inactivity as a result of weakness and/or poor motivation, and increased risk of falls related to muscle weakness and poor balance. T treatment may increase BMD indirectly by increasing E2, GH, and IGF-1 levels and physical activity, and reducing the likelihood of falls by improving muscle strength, balance, and spatial cognition. Conversely, many of the factors that decrease BMD (e.g., poor nutrition, medications, comorbid illnesses, and excessive alcohol intake) also may contribute to the reduction in serum T levels. Correction of poor nutrition, discontinuation of certain medications such as glucocorticoids, treatment of comorbid illnesses, and discontinuation of alcohol abuse may increase serum T levels and obviate the need for T treatment. In the clinical approach to older men with low serum T levels, a similar multifactorial evaluation of possible etiological factors contributing to other age-related physiological alterations should be adopted.

#### *Potential Consequences and Importance of Age-Associated Physiological Changes*

Age-associated changes in physiological function have important potential consequences, including reduced physical function, endurance, and activity; increased risk of disease (e.g. coronary heart disease, diabetes mellitus, osteoporosis); diminished quality of life; impaired balance and increased risk of falls; impaired ability to regain function after an acute illness; and, most importantly, increased susceptibility to frailty (2,363). In turn, frailty may lead to a loss of independence, chronic disability, and a need for assisted living or long-term care; severe psychological and socioeconomic sequelae; and an increase in mortality.

A major clinical focus of geriatric medicine is the prevention of frailty. A multifaceted approach is employed to prevent frailty in elderly persons. This includes interventions to prevent acute and chronic diseases (e.g., influenza vaccination, smoking cessation); prevent falls and injury (e.g., discontinuation of medications that predispose to falls and hip protectors); adequately treat acute and chronic diseases; identify and treat conditions that impede recovery of function (e.g., delirium and depression); improve physical conditioning (e.g., aerobic and resistance exercise); improve nutritional intake; and replace hormonal loss (e.g., estrogen replacement therapy in postmenopausal women). With regard to the more gradual and less profound age-related decline in serum T levels, major unanswered clinical questions are whether T replacement therapy of older men will im-

prove functional status, prevent disease, increase the quality of life, and, most importantly, reduce the risk of frailty (2,364).

### POTENTIAL BENEFITS AND RISKS OF T REPLACEMENT THERAPY IN OLDER MEN

When considering T replacement therapy in older men, the potential benefits of T treatment must be weighed against the possible risks (365). The potential benefits and risks of T replacement therapy in older men (Table 1) are based mostly on the clinical studies of the effects of T replacement in severely androgen-deficient, young, hypogonadal men (discussed in the previous section) and a small number of controlled trials of T treatment in older men (discussed in the following section).

Potential benefits of T replacement therapy in older men include increased lean body mass; decreased fat mass and visceral adiposity, and reduced risk of diabetes mellitus; increased muscle mass and strength; increased BMD and reduced risk of osteoporosis and fractures; increased body hair and skin thickness, and improved wound healing; improved physical function, aerobic capacity, and balance; improved libido and sexual function; improved feeling of well being and improved energy; reduced irritability and depressed mood; improved concentration and cognitive function; improved sleep quality; increased hematopoiesis and hematocrit; and decreased risk of CAD.

Short-term risks of T administration in older men include stimulation of erythropoiesis, resulting in excessive erythrocytosis and, if severe, increased blood viscosity and risk of thrombotic complications (e.g., stroke and myocardial infarction); induction or worsening of obstructive sleep apnea; worsening of peripheral edema; and development of gynecomastia.

The most concerning long-term potential risk of T administration in older men is the stimulation of previously unrecognized local or metastatic prostate cancer (366). Prostate

cancer is the most common malignancy in men, and many older men harbor microscopic foci of prostate cancer that do not become clinically apparent during their lifetime (367). In most (368–370) but not all (371) epidemiological studies, serum T levels were not associated with a risk of prostate cancer. However, because prostate cancer growth is initially androgen-dependent, there is concern that T treatment of older men will stimulate growth of preexisting subclinical (microscopic) prostate cancer to become clinically detectable. This concern is heightened by reports that find a high prevalence of prostate cancer (~25%) on surveillance biopsies of older men with low serum T, and normal prostate-specific antigen (PSA) levels and digital rectal examinations (372,373). However, biopsies were not performed in an age-matched control group of men with normal T levels in these studies, and in other studies, the prevalence of prostate cancer in older men with normal PSA levels and digital rectal examinations is comparable to those found in these reports (374). As a consequence of more intensive monitoring of digital rectal examinations and PSA levels, another underappreciated potential risk of T treatment in older men is the increased likelihood of detecting subclinical localized prostate cancer for which treatment is unclear. Even if subclinical disease discovered on biopsy does not affect overall prognosis, the potential medical, surgical, psychological, socioeconomic, legal, and ethical consequences of a diagnosis of subclinical prostate disease may be quite great.

Benign prostate growth is also androgen-dependent (375,376). At the time of puberty, prostate size increases in response to the increases in endogenous T production. Patients with severe prepubertal androgen deficiency have small, underdeveloped prostate glands, and if left untreated, these men do not develop BPH. Long-term T treatment of young hypogonadal men increases prostate size to volumes that are comparable to age-matched eugonadal men (377,378). In men with BPH, treatment with a 5 alpha-reductase inhibitor (e.g., finasteride, which inhibits the conversion of T to the potent androgen DHT) decreases prostate size, improves urine flow, reduces symptoms of BPH, and decreases the need for BPH-related surgery (379). Therefore, another potential long-term risk and concern of T treatment in older men is the stimulation of BPH growth and worsening of symptoms, urine flow, and urinary retention that may require invasive intervention, such as a transurethral resection of the prostate (TURP).

Although rarely an issue, T replacement may suppress already compromised sperm production in older men and potentially reduce fertility. Men have a higher risk of CAD than women. Also, treatment of severely androgen-deficient, young, hypogonadal men with physiological T dosages and eugonadal men with supraphysiological T dosages decreases HDL cholesterol levels, producing a more atherogenic profile (286,380–385). Therefore, there is concern by some that T replacement in older men may increase the risk of cardiovascular disease. As discussed previously, most epidemiological studies suggest that low T levels are associated with an increase in the prevalence and severity of CAD in men. However, in the absence of long-term studies to evaluate the effects of T on major cardiovascular outcomes such as coronary death, myocardial infarction, and stroke,

Table 1. Testosterone Treatment in Older Men: Potential Benefits and Risks

| Potential Benefits           | Potential Risks                   |
|------------------------------|-----------------------------------|
| Improve body composition     | Erythrocytosis, hyperviscosity    |
| ↑ Lean body mass             | Induce or worsen sleep apnea      |
| ↓ Fat mass, ↓ visceral fat   | Worsen edema                      |
| ↑ Muscle mass and strength   | Gynecomastia                      |
| ↑ BMD, ↓ fractures           | Clinical prostate disease         |
| ↑ Hair, skin thickness       | Worsen BPH requiring intervention |
| ↑ Physical function          | Hasten clinical prostate cancer   |
| Improve brain function       | Suppress sperm production         |
| ↑ Libido, sexual function    | Increase cardiovascular risk      |
| ↑ Well being, energy         |                                   |
| ↓ Irritability, depression   |                                   |
| ↑ Cognitive function         |                                   |
| ↑ Sleep quality              |                                   |
| Increase hematocrit          |                                   |
| Decrease cardiovascular risk |                                   |

Notes: ↑ Signifies a potential increase or improvement in the endpoint with testosterone treatment. ↓ Signifies a potential decrease or reduction in the endpoint with testosterone treatment. BMD = bone mineral density; BPH = benign prostatic hyperplasia.

the possibility remains that T therapy in older men may increase cardiovascular disease risk.

### CLINICAL TRIALS OF T THERAPY IN OLDER MEN

Relatively few randomized controlled studies have been reported that investigate the effects of T treatment in older men (386–423). In these studies, a variety of T formulations and dosages were used to treat a relatively small number of mostly healthy older men, and differing methods were used to assess outcomes. However, these preliminary controlled studies suggest that T treatment in older men has beneficial effects on body composition (increase in lean body mass and decrease in fat mass), bone mineral density, LDL cholesterol, angina and exercise-induced cardiac ischemia, and possibly on muscle strength, sexual function, general well being, and aspects of cognitive function (Table 2).

No formal evaluation of the dose-response effects of T treatment on relevant outcomes has been performed in older compared to young, androgen-deficient men. Therefore, the impression that the effects of T treatment are attenuated in older men relative to young men is not supported by evidence. Also, most studies have been performed on relatively healthy older men with T levels in the lower part of the normal range or slightly below normal. Therefore, it is difficult to compare the effects of T therapy in these studies of

mildly androgen-deficient older men to those found in studies of more severely T-deficient young men.

### Beneficial Effects of T Therapy in Studies of Older Men

In most controlled trials of older men, T treatment resulted in improvements in body composition. In both controlled (388,390,401,405,406,415,417,418,424) and uncontrolled (425) studies, the most consistent effects of T therapy in older men were an increase in lean body mass and/or a decrease in total fat mass. One study found a decrease in visceral fat mass and improvement in insulin sensitivity with T treatment (406). The effects of T supplementation in older men on muscle strength were more variable. Some studies found an increase in upper extremity grip strength (408,415,424), and one uncontrolled study found an increase on lower extremity strength with T therapy (425). However, other carefully performed controlled studies found no increase in either upper or lower extremity strength with T treatment of older men (388,391,394,405, 417,418). The lack of consistent effects of T therapy on muscle strength may be due to differences in the methods used to assess strength and the dosages and duration of T that were administered. In a preliminary report, timed walking and stair climbing improved in older men with short-term T administration (391). Self-assessment of physical function was maintained in older men treated with transdermal T compared to placebo for 3 years (417). Supraphysiological but not physiological T administration also has been reported to increase the secretion of another anabolic hormone, GH, in older but not young men (398). No controlled studies have investigated systematically the effect of T therapy in older men on muscle power, balance, or endurance, which together with strength play important roles in the maintenance of physical function in older men.

Controlled studies in which T was administered for at least 1 year demonstrated an increase in lumbar spine and hip BMD and prevention of bone loss in the femoral neck with T compared to placebo treatment in older men with low T levels (388,405,424). In one study, T prevented loss of BMD in the femoral neck despite calcium and vitamin D supplementation in all subjects (405). In another study that included older men with normal serum T levels and in which some but not all subjects received calcium and vitamin D (if dietary intake was inadequate), both T- and placebo-treated men exhibited an increase in BMD without a significant difference in response between the two groups (416). However, further analysis revealed that T treatment increased BMD in older men who had low serum T levels (<300 ng/dl) at baseline, suggesting that a beneficial effect of T treatment on BMD may occur only in older men with androgen deficiency. These studies emphasize the importance of considering other etiologies besides low T levels that may contribute to clinical manifestations consistent with androgen deficiency in older men (e.g., low calcium intake and vitamin D deficiency in older men with low BMD) (426). No controlled studies have evaluated the effect of T on bone architecture or the risk of falls that together with BMD contribute to the age-related increase in the risk of fractures in men. Furthermore, no studies have investigated sufficient numbers of older men for long

Table 2. Testosterone Treatment of Older Men: Summary of Controlled Studies

| Benefits |                                           | Risks |                                    |
|----------|-------------------------------------------|-------|------------------------------------|
| ↑        | Lean body mass                            | ↑     | Hematocrit, risk of erythrocytosis |
| ↓        | Fat mass                                  | η     | Sleep apnea                        |
| ↑/η      | Grip and leg strength                     | η     | Clinical prostate disease          |
| ↑        | BMD (if low T initially)<br>? ↓ Fractures | η     | BPH symptoms, size,<br>urine flow  |
| ↑/η      | Sexual function, well being               | ↑/η   | PSA (<4 ng/ml)                     |
|          | ↑ Libido                                  | ?     | ↑ BPH intervention                 |
|          | η Erectile dysfunction                    | ?     | ↑ Clinical prostate cancer         |
|          | ↑ Well being, ? ↓ depression              | η     | HDL cholesterol                    |
| ↑/η      | Cognitive function                        | ?     | ↑ Cardiovascular events            |
|          | ↑ Spatial, working memory                 |       |                                    |
|          | ↑ Verbal memory                           |       |                                    |
|          | η Visual memory                           |       |                                    |
|          | ? Slow dementia onset                     |       |                                    |
| ↓        | Total and LDL cholesterol                 |       |                                    |
| ↓        | Angina and exercise ischemia              |       |                                    |
|          | ? ↓ Cardiovascular events                 |       |                                    |
| ?        | ↑ Physical function                       |       |                                    |
| ?        | ↓ Frailty                                 |       |                                    |
| ?        | ↑ Quality of life                         |       |                                    |

Notes: Composite of benefits and risks of testosterone treatment in older men derived from references (385–422). ↑ Signifies that most controlled studies found an increase in the endpoint with testosterone treatment. ↓ Signifies that most controlled studies found a decrease in the endpoint with testosterone treatment. η Signifies that most controlled studies found no change in the endpoint with testosterone treatment. ↑/η Signifies that some controlled studies found an increase and others found no change in the endpoint with testosterone treatment. ? Signifies that controlled studies have not been performed to address the endpoint sufficiently. BMD = bone mineral density; LDL = low-density lipoprotein; BPH = benign prostatic hyperplasia; PSA = prostate-specific antigen; HDL = high-density lipoprotein.

enough (i.e., had sufficient statistical power) to determine whether T treatment decreases the incidence of fractures in older men.

T treatment in older men increased libido and sexual activity and improved energy and well being in some controlled studies (400,406,410,413,418,419) but not in others (388,389,403,404,408,415,417). An uncontrolled trial also reported improvements in energy, mood, well being, libido, and sexual activity (427). One controlled study found no effect of T therapy on clinical depression in older men (415). Other studies have not investigated the effect of T on depression in older men. In a recent small, double-blind, randomized, placebo-controlled study of depressed hypogonadal middle-aged men, short-term T administration (6 weeks) improved sexual function but did not improve depression scores compared to placebo (266). In preliminary placebo-controlled studies, certain domains of cognitive function, specifically spatial, verbal, and working memory, improved with T treatment in older men (392,403,404) but had no effect on general memory, recall, or verbal fluency (415). In one preliminary study, very short-term T administration (5 days) prevented the improvement in verbal fluency observed in placebo-treated older men (423). Studies have not investigated whether T treatment will slow the onset of clinical dementia in older men.

Most controlled studies of T therapy in older men found a decrease in total and low-density lipoprotein (LDL) cholesterol with no significant effect on high-density lipoprotein (HDL) cholesterol (393,406,408,415,418,420,424). T treatment inhibited triglyceride uptake and lipoprotein lipase activity in abdominal but not femoral subcutaneous adipose tissue depots (407). In several small, randomized, placebo-controlled studies of middle-aged to older men with coronary heart disease, chronic T treatment decreased angina and exercise-induced cardiac ischemia (i.e., increased the time to ST segment depression during exercise testing) (397,402,414,428). Also, acute intravenous administration of T during cardiac catheterization was shown to improve exercise-induced ischemia in older men with CAD, probably by inducing coronary artery vasodilation (411,412, 421,422). Subjects with angina also reported significant improvements in quality of life, especially in pain perception and limitation resulting from physical problems (397). Therefore, in contrast to the general perception that androgens are bad for the heart, T administration may have beneficial effects in older men with cardiovascular disease. No clinical trials have studied sufficient numbers of men for long enough periods of time to evaluate the effects of T replacement in older men on major cardiovascular events, such as cardiac death, myocardial infarction, or stroke.

In a recent small controlled study, T treatment improved physical functional status, grip strength, and mood compared to placebo in a small number of relatively frail older men undergoing rehabilitation on a Geriatric Evaluation and Management unit (387). In older men undergoing elective knee or hip arthroplasty, serum T levels were suppressed significantly postoperatively in men treated with placebo, and perioperative supraphysiological T administration tended to improve postoperative strength, physical function, and hematocrit (386). More significant improvements in muscle

strength and physical function, and reduction in hospitalization and rehabilitation duration were probably not observed in this study because the subjects studied were healthy, independently living, older men who were functioning at a relatively high level prior to surgery.

Except for the limited studies mentioned, the effects of T replacement on physical function, health-related quality of life, and the prevention of frailty have not been investigated fully in older men. The prevention of frailty is an important potential goal of T treatment in older men. The frail older population is at high risk for disability, loss of independence, and long-term care, and they utilize a major proportion of health care resources and dollars. Compared with healthy older men, frail older men have lower serum T levels and may derive more functional benefit from T treatment.

#### *Adverse Effects of T Replacement in Studies of Older Men*

In controlled studies of up to 3 years in duration, T therapy in older men has been tolerated very well. The only adverse effect that has been found consistently in controlled trials of T treatment in older men is stimulation of excessive erythrocytosis. However, a major caveat is that studies have been powered insufficiently to evaluate the long-term risks of T therapy on prostate and cardiovascular disease, and therefore these potential risks remain unknown.

Stimulation of erythropoiesis and an increase in hematocrit of 3% to 5% over baseline has been found in most controlled trials of T treatment in older men. The development of erythrocytosis (hematocrit over 51%) during T therapy has been reported in 6% to 25% of older men (394,395, 399,402,415,416,418). Erythrocytosis has occurred in older men with both parenteral and transdermal T administration, but it has been less common with the latter (397,405). This may be related to the supraphysiological T levels that are produced during the first few days following T ester injections and overall higher mean serum T concentrations compared with the more physiological T levels that are produced with the use of T patches or gel. An excessive increase in hematocrit of more than 55% to 60% results in a substantial increase in blood viscosity and, if untreated, may result in significant hyperviscosity and an increased risk of thrombotic complications. The latter, more serious complications of excessive erythrocytosis have not been observed in T treatment trials in older men.

Although T administration has been reported to induce or worsen obstructive sleep apnea syndrome in younger hypogonadal men (429,430), this complication has not been reported in clinical trials of T therapy in older men (416). Obstructive sleep apnea may be associated with low serum T concentrations (431,432). Therefore, older men with risk factors (e.g., obesity) or symptoms of obstructive sleep apnea (e.g., daytime somnolence and snoring) should be evaluated for symptoms of sleep apnea prior to institution of T treatment and should be monitored for this potentially serious risk during therapy. Validated instruments, such as the Berlin Questionnaire or Epworth Sleepiness Scale, may be used for screening and monitoring (433–436).

The most worrisome potential risk of T replacement ther-



apy in older men is the induction of clinical prostate disease. Most (368,369,437) but not all (371,438,439) descriptive studies have failed to find a significant relationship between endogenous T levels and the development of BPH or prostate cancer. In controlled trials, there has been no significant increase in prostate size, worsening of BPH symptoms, or reduction in urine flow rate in T-treated compared with placebo-treated older men (386,388,399,400,405,406,415,416, 418). In some trials of T therapy in older men, serum PSA levels increased slightly, mostly within the normal range (below 4 ng/ml) (392,405,408,416,418), but in most studies, PSA did not change significantly during T treatment. No increase in the need for invasive or surgical therapy for BPH or incidence of clinically apparent prostate cancer has been reported. However, the total number of men treated with T and length of exposure have been limited, and studies have not had the statistical power to evaluate the long-term risks of clinical BPH and prostate cancer in older men treated with T.

In contrast to the suppression of HDL cholesterol that occurs with T replacement in younger men with severe hypogonadism and supraphysiological T administration in young eugonadal men (286,380–385), most controlled trials of T treatment in older men have not found a significant decrease in HDL cholesterol (393,406,415,418,420). As mentioned previously, total and LDL cholesterol decreased in most studies (393,406,418,420) and were unchanged in the remaining trials (394,415) during T therapy of older men. As with prostate disease, clinical trials have not investigated the long-term cardiovascular risk of T replacement treatment in older men. They have not had sufficient statistical power to determine whether T treatment affects the rates of major cardiovascular events such as coronary death, myocardial infarction, and stroke.

Other known adverse effects of T therapy in younger hypogonadal men, such as development or worsening of edema, especially in men with underlying edematous states (e.g., congestive heart failure, hepatic cirrhosis, nephrotic syndrome, and renal failure), gynecomastia, especially in moderate obese men, and suppression of spermatogenesis have not been reported in clinical trials of older men.

#### **APPROACH TO THE DIAGNOSIS OF ANDROGEN DEFICIENCY IN OLDER MEN**

Although an increasing proportion of men exhibit low serum T levels with increasing age, a substantial number of older men maintain T levels within the normal range. These individuals may exhibit clinical manifestations consistent with androgen deficiency. It may be argued that they have relative androgen deficiency (i.e., a significant age-related decline in T levels within the wide normal range) contributing to their clinical manifestations. However, the clinical manifestations of androgen deficiency are not specific and are usually multifactorial in nature, and there is no evidence that these men would benefit from T therapy. Furthermore, the clinical significance of slightly low serum T levels in the absence of clinical manifestations consistent with androgen deficiency is not clear. Therefore, the diagnosis of andropause requires both the presence of clinical manifestations or a clinical syndrome, and confirmed serum-free or bio-

available T levels below the normal range for younger men. A rational approach to the diagnosis of androgen deficiency in older men is outlined in Figure 2 and is discussed in the following sections.

#### *The Clinical Syndrome of Androgen Deficiency in Older Men*

In order to define a clinical syndrome associated with low T and to identify older men at high risk for low serum T levels, two screening instruments were developed recently. The ADAM questionnaire is a symptom-based instrument that identifies older men with symptoms of low T, with 88% sensitivity and 60% specificity (49). Symptoms associated with low serum T levels in this questionnaire are reduced libido; lack of energy; decreased strength and/or endurance; loss of height; decreased enjoyment of life; feeling sad and/or grumpy; reduced strength of erections; decreased ability to play sports; falling asleep after dinner; and reduced work performance. This symptom complex is similar to that reported by others for the androgen deficiency in older men (440–443). The MMAS questionnaire is an epidemiology-derived instrument that identifies risk factors for low T levels in older men, with 75% sensitivity and 50% specificity (444). Risk factors that are associated with low total T levels include age of 60 years or older; treated diabetes mellitus; treated asthma (a surrogate for glucocorticoid use); sleeplessness ( $\leq 5$  hours); nonsmoking; headaches in the past 2 weeks (a surrogate for stress); low dominance (dislike of a directing role); and body mass index (BMI) 27–30 or  $>30$ .

A combination of symptoms and risk factors may better identify individuals with low T levels. Therefore, a composite of the most prominent clinical manifestations of androgen deficiency in older men is presented in Table 3. Symptoms of androgen deficiency in older men include decreased muscle strength and/or endurance; diminished work and/or athletic performance; loss of height; history of nontraumatic fracture; decreased pubic and axillary hair; reduced physical function; diminished sexual interest and desire; decreased strength and adequacy of erections; fatigue, tiredness, and lack of energy; irritability; depressed mood; decreased general well-being and enjoyment of life; sleep disturbance; sweats; and hot flushes. Signs include decreased muscle mass and strength; increased visceral adiposity; low BMD [osteoporosis or BMD  $< -2.5$  SD below that of young men (T-score  $< -2.5$ ) or osteopenia (T-score  $-1$  to  $-2.5$ )]; vertebral and/or hip fracture; decreased pubic and axillary hair; depressed mood; decreased testis size; gynecomastia; and a normocytic, normochromic anemia.

#### *Repeated Low Serum T Levels in the Absence of Reversible or Remediable Causes*

If clinical manifestations suggest androgen deficiency, an early morning (e.g., 8 AM) T level should be measured to confirm low serum T levels. In order to avoid the confounding effects of alterations in SHBG levels on total T, a free or bioavailable T level by equilibrium dialysis or ammonium sulfate, respectively, is recommended for confirmation of androgen deficiency in older men (52,445,446). Alternatively, free or bioavailable T levels may be calculated from

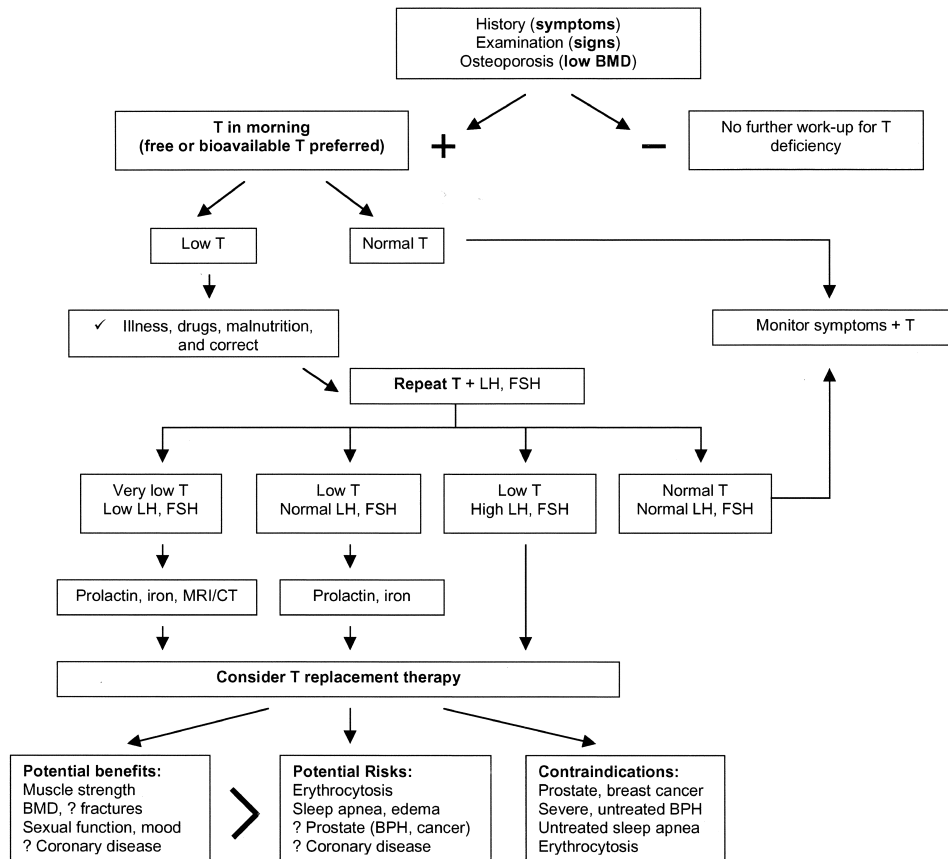

Figure 2. Approach to the diagnosis and treatment of androgen deficiency in older men. Diagnostic evaluation for androgen deficiency in older men should be instituted only in individuals with symptoms and signs consistent with androgen deficiency. Initially, androgen deficiency should be confirmed with the measurement of a morning serum-free or bioavailable T level. Individuals with an initially low free or bioavailable T level should be evaluated for remediable causes of androgen deficiency (e.g., illness, medications, or malnutrition) and have serum T levels repeated in conjunction with gonadotropin (luteinizing hormone [LH] and follicle-stimulating hormone [FSH]) levels. Men who demonstrate secondary hypogonadism (low T and normal to low gonadotropin levels) should have measurements of serum prolactin and iron to rule out hyperprolactinemia and hemochromatosis. Imaging of the hypothalamus and pituitary to rule out a tumor or destructive lesion should be reserved for men with very low T and low gonadotropin levels, and/or those with markedly elevated prolactin levels (e.g., >100 ng/ml). T replacement therapy should be considered in men with clinical manifestations of androgen deficiency and repeatedly low serum T levels after appropriate correction or treatment of remediable causes, and if the clinician and patient feel that the potential benefits of treatment outweigh the potential risks, and there are no contraindications. BMD = bone mineral density; MRI/CT = magnetic resonance imaging/computed tomography; BPH = benign prostatic hyperplasia.

total T and SHBG measurements; calculated values are comparable to those measured by equilibrium dialysis and ammonium sulfate precipitation methods (52).

Because total T assays and free T by direct analog immunoassay vary with alterations in SHBG levels, they are not recommended (52,53,55,56,446). However, these assays are usually the only ones that are currently available in local clinical laboratories. If total T or free T using direct analog immunoassay method is used initially to evaluate older men with clinical manifestations of androgen deficiency, values that are in the low-normal to moderately low range (e.g., total T of 350–200 ng/dl) should be confirmed with a free or bioavailable T level measured using a more accurate method. Unless SHBG levels are very low (e.g., nephrotic syndrome), total T levels <200 ng/dl in the presence of consistent clinical manifestations are usually diagnostic of androgen deficiency.

In younger hypogonadal men, T levels below the normal range are usually associated with symptoms of androgen deficiency. Therefore, the normal range in younger men is used as the reference range for older men as well. This approach is analogous to that used for the interpretation of BMD where values are compared to those in younger men (T-score or SD from young controls) and are used to define a clinically significant BMD that is associated with an increased risk of fracture (e.g., osteoporosis defined as a T-score <−2.5).

If the initial serum T level is low, evaluation of underlying acute and chronic illnesses, medications, and nutritional state should be undertaken to determine whether there are reversible or remediable causes of low T levels. In these instances, T level should be repeated after the stress of a current or recent illness is resolved, medications that may lower T (e.g., glucocorticoids or CNS-active drugs) are dis-

Table 3. Androgen Deficiency in Older Men: Clinical Manifestations

| Symptoms                             | Signs                           |
|--------------------------------------|---------------------------------|
| ↓ Muscle strength and/or endurance   | ↓ Muscle mass and strength      |
| ↓ Work and/or athletic performance   | ↑ Visceral adiposity            |
| Loss of height, history of fractures | Low BMD (osteoporosis)          |
| ↓ Pubic and axillary hair            | Vertebral and/or hip fracture   |
| ↓ Physical function                  | ↓ Pubic and axillary hair       |
| ↓ Sexual interest and desire         | Depressed mood                  |
| ↓ Strength of erections              | ↓ Testis size                   |
| Fatigue, tiredness, lack of energy   | Gynecomastia                    |
| Irritability, depressed mood         | Normocytic, normochromic anemia |
| ↓ Well-being, enjoyment of life      |                                 |
| Sleep disturbances                   |                                 |
| Sweats, hot flushes                  |                                 |

Notes: Composite of symptoms and signs from references (49,438–442). BMD = bone mineral density.

continued, and nutritional compromise (e.g., associated with illness) is corrected.

If no correctable cause of androgen deficiency is found, a T level should be repeated together with serum gonadotropin (LH and FSH) levels. There are significant biological and methodological variations in serum T measurements such that as many as 15% of healthy young men may have a T level below the normal range in a 24-hour period (447). Older men with initially low T values may have normal levels on a subsequent blood sample. Therefore, before committing someone to T replacement therapy, a repeat serum T level should always be obtained to confirm androgen deficiency.

If the initial serum-free or bioavailable T level is within the normal range in a man with symptoms and/or signs of androgen deficiency, the patient's clinical status and serum T levels should be monitored on follow-up visits. Finally, because clinical manifestations of androgen deficiency usually have multiple etiologies in older men, evaluation and appropriate treatment of other causes of clinical findings should be undertaken concomitantly with the work-up for androgen deficiency.

#### Further Evaluation of Older Men With Low T Levels

If the repeated serum-free or bioavailable T level is low and is associated with inappropriately normal or low gonadotropin levels (i.e., a hormonal pattern of secondary hypogonadism) serum prolactin and iron should be obtained to rule out hyperprolactinemia and hemochromatosis (iron overload), both of which can suppress gonadotropin and T secretion. In individuals with very low T (e.g., total T < 150 ng/dl) and low gonadotropin levels, and/or those with markedly elevated prolactin levels (e.g., >100 ng/ml), an MRI or CT scan of the hypothalamus and pituitary should be performed to rule out a tumor or destructive lesion in this area (448). Men with hyperprolactinemia, hemochromatosis, or hypothalamic-pituitary tumor or destructive lesion should be treated appropriately with consultation from an endocrinologist. In the absence of these conditions, and in older men in whom repeated serum T level is low and is as-

sociated with elevated gonadotropin levels, T replacement treatment should be considered. If the repeat serum-free or bioavailable T and gonadotropin levels are within the normal range, the patient's clinical status should be monitored together with serum T levels.

#### Consideration of T Treatment in Older Men With Repeatedly Low T Levels

The state of knowledge regarding the benefits and risks of T treatment in older men is based on a limited number of short-term controlled studies (3,449–453). No controlled studies have evaluated the long-term benefits and risks of T therapy in older men. Therefore, there are insufficient data to formulate firm evidence-based clinical guidelines and general recommendations for T therapy in older men. Routine treatment of older men cannot be recommended at this time. After a thorough assessment and discussion of potential benefits and risks of T therapy, individual practitioners must rely on sound clinical judgment and informed patient preferences before deciding to recommend and prescribe T treatment for older men with clinical manifestations consistent with androgen deficiency and repeatedly low serum T levels.

As outlined in Figure 2, T therapy should be considered only in older men with clinical manifestations of androgen deficiency and repeatedly low serum T levels, in whom remediable causes of low T have been corrected or treated appropriately. This approach is consistent with that recommended by consensus panels of experts in the field (446,454). T treatment should be instituted in these men if both the clinician and the patient feel that the potential benefits (e.g., severe muscle weakness, osteoporosis, or alterations in sexual function or mood) of treatment outweigh the potential risks (e.g., erythrocytosis and prostate disease) and if no contraindications exist. Absolute contraindications to T therapy are prostate and breast cancer, and relative contraindications are untreated BPH with severe bladder outlet obstruction, untreated obstructive sleep apnea syndrome, and erythrocytosis.

#### T THERAPY AND MONITORING IN OLDER MEN

##### Baseline Evaluation and Goals of T Replacement

Prior to institution of T therapy, a careful baseline clinical evaluation should be performed in order to determine whether there is a history of: prostate or breast cancer, or family history or risks for these androgen-dependent malignancies; severe symptoms of BPH [e.g., using the International Prostate Symptom Score (IPSS) or American Urological Association (AUA) Symptom Score] or sleep apnea (e.g., using the Berlin Questionnaire or Epworth Sleepiness Scale); an abnormal digital rectal examination (e.g., induration or nodule) requiring prostate ultrasound and biopsy; erythrocytosis (hematocrit >52); or an elevated PSA level >4 ng/ml (after empiric treatment for prostatitis and repeat PSA determination).

In the absence of knowledge regarding the dose-response effects of T treatment and lack of evidence for altered androgen requirements in older men, a reasonable goal of T replacement is to restore serum T levels into the mid-normal

range for younger men and to alleviate the clinical manifestations of androgen deficiency.

#### *Preparations Available and Under Development for T Replacement Therapy*

There are several formulations available for T replacement therapy in older men (455,456). The most commonly used preparations for T replacement are parenteral 17 beta-hydroxy-esters of T, T enanthate, or cypionate, usually administered by intramuscular injections at a dosage of 150–200 mg every 2 weeks (457). These T esters are safe, effective, and the least expensive formulation available for androgen replacement therapy. However, serum T levels rise to suprphysiological levels during the first few days following injection of T esters and fall into the low-normal range or below normal just before the next injection. The extreme variations in T levels between injections are often accompanied by fluctuations in energy, libido, and mood that may be bothersome to patients. Transient suprphysiological T levels and overall higher average T levels during treatment with T esters may be associated with a higher incidence of side effects, such as erythrocytosis. It is possible that low-dosage androgen supplementation with T enanthate or cypionate (e.g., 50–100 mg every 2 weeks) may have beneficial effects (e.g., on libido, energy, and well-being) without these side effects (458), but this has not been evaluated in controlled clinical trials.

Three transdermal T patches are available for T replacement therapy (459,460). They require daily application but provide more physiological serum T levels (usually in the low- to mid-normal range) than T ester injections. T patches have the advantage that treatment may be discontinued rapidly if adverse effects were to develop in older men, but they are more expensive than replacement with T ester injections. The Testoderm® patch (Alza, Palo Alto, CA) is effective but requires application to a clean, dry, often shaven scrotum, and many men find this site of application unacceptable (218). This patch also produces high serum DHT levels, probably as a result of high 5 alpha-reductase activity in scrotal skin. The clinical consequences of high DHT levels, however, are not known. The Androderm® patch (Watson, Corona, CA) may be applied to non-scrotal skin, but the adhesive and/or enhancing agents used in this patch may cause significant skin irritation (461–463). Skin irritation may be reduced by coapplication of a glucocorticoid cream such as triamcinolone (464). The Testoderm TTS® patch (Alza, Palo Alto, CA) is also applied to non-scrotal skin and causes much less skin irritation because it has less adhesive and does not use enhancing agents (465). However, it is larger than the Androderm patch and may adhere poorly to skin, especially with vigorous exercise or excessive sweating, resulting in lower serum T levels.

Recently, a transdermal T gel, AndroGel® (Unimed/Solvay, Buffalo Grove, IL), became available for T replacement therapy (260,261,466,467). Daily application of this hydroalcoholic gel formulation of T produces physiological serum T levels. The dosage of T gel may be adjusted to achieve T levels in the low-, mid-, or upper-normal range without significant skin irritation. AndroGel may also produce serum DHT levels above the normal range, probably

as a result of the large surface area of skin covered. Transfer of T to partners or children is possible if the skin surface on which T gel is applied is not covered or washed (which is acceptable 1 hour after application).

Oral 17 alpha-alkylated androgens (e.g., methyltestosterone) should not be used for androgen replacement therapy (456). They are less effective than parenteral and transdermal T formulations and are associated with potentially serious hepatotoxicity and greater suppression of HDL cholesterol levels. Outside the United States, an oral T ester formulation, T undecanoate, has been used successfully and safely for many years for T replacement therapy in both young and older androgen-deficient men (449,456,468). Unlike 17 alpha-alkylated androgens, T undecanoate is absorbed directly from the gastrointestinal tract into lymphatics, bypassing initial hepatic inactivation, and it is not associated with hepatotoxicity (468). However, absorption of oral T undecanoate is quite variable and is dependent on co-ingestion of a meal. T undecanoate may become available in the United States in the future. A buccal T formulation is also being developed for androgen replacement therapy. Both the T undecanoate and buccal T have the advantage of rapid withdrawal if adverse effects develop, but the disadvantage of requiring twice daily administration, making compliance more difficult in older patients.

A number of longer-acting T formulations that require injections only every few months are being developed for T replacement therapy (e.g., T undecanoate, T buciclate, and T microspheres), and T implants have been used for androgen replacement outside the United States (456). Although more convenient than currently available T esters, these preparations are probably less suitable for T therapy in older men because rapid withdrawal of androgen would not be possible if adverse effects were to develop during treatment.

Analogous to recently developed selective estrogen receptor modulators used for hormone replacement therapy in post-menopausal women, selective androgen receptor modulators (SARMs) or “designer” androgens are being developed for T replacement therapy. An ideal SARM would be an agent that had all the beneficial effects of T on muscle, bone, sexual function, mood, cognition, and the cardiovascular system without any of the adverse effects on the prostate and cardiovascular system. 7 alpha-methyl-19-nortestosterone (MENT) is synthetic androgen that does not undergo 5 alpha-reduction but is aromatizable to an estrogen. In animal studies, it is approximately 10 times more potent than T in suppressing gonadotropin levels and increasing muscle size, but only two-times more active than T in stimulating prostate growth (469,470). Therefore, it is possible that a low dose of MENT given to hypogonadal men may be able to maintain muscle strength and brain function without stimulating the prostate gland. MENT is being developed as an implant, and preliminary studies suggest that it is able to maintain libido and sexual function in hypogonadal men (471).

#### *Monitoring During T Therapy in Older Men*

In older men, clinical examination including a digital rectal examination, hematocrit, and PSA should be repeated 3 and/or 6 months after institution of T treatment, then moni-

tored every 12 months or possibly more frequently thereafter, depending on the clinical status of the patient. Efficacy is determined primarily by subjective and objective clinical responses to T therapy. If symptomatic clinical improvement does not occur in 6–12 months and/or BMD does not improve in 24 months, patients should be re-evaluated and discontinuation of T therapy should be considered. Serum T levels measured at the midpoint of the interval between T ester injections or T patch applications may be useful to confirm that levels are within the midnormal range. Nadir serum T levels (i.e., just before the next T ester injection or patch application) may be helpful in identifying the need for a dosage adjustment.

During T treatment, the following clinical situations require further urological evaluation: development of findings suspicious for prostate cancer on digital rectal examination (e.g., a nodule or induration); PSA level  $>4$  ng/ml that is not complicated by a urinary tract infection (e.g., prostatitis) (472,473); a confirmed increase in PSA of  $>1.5$  ng/ml between two consecutive values over 3–6 months (474); a rate of rise in PSA levels of  $>0.75$  ng/ml/y on sequential values performed over at least 2 years (475); or severe symptoms of BPH (e.g., as assessed using the AUA Symptom Score or IPSS instruments) that are not complicated by medications (e.g., decongestants or antihistamines) or a urinary tract infection (e.g., prostatitis). A urological evaluation including a transrectal ultrasound and prostate biopsy is indicated for an abnormal digital rectal examination or PSA elevation (i.e., a persistent elevation of PSA after empiric antibiotic treatment for prostatitis). Development of an increase in hematocrit  $>52\%$  requires reduction in T dosage or discontinuation of therapy. For severe erythrocytosis (e.g., hematocrit  $>55\%$ ), T therapy should be discontinued, and a therapeutic phlebotomy should be performed to acutely reduce the red cell mass and prevent hyperviscosity. After the hematocrit is normalized, T treatment may be reinstated using a lower dosage or a transdermal formulation. Other causes of erythrocytosis (e.g., obstructive sleep apnea that may be induced or worsened by T treatment, or chronic hypoxic lung disease) should be evaluated and treated appropriately. The development of daytime somnolence, loud snoring, hypertension, edema, and erythrocytosis in an obese older man on T therapy suggests obstructive sleep apnea syndrome. Instruments such as the Berlin Questionnaire or Epworth Sleepiness Scale may be used to assess symptoms of sleep apnea.

## SUMMARY AND CONCLUSIONS

In men, there is a gradual and progressive decline in serum T levels with aging that is accentuated by age-associated comorbid illnesses, medications, and malnutrition. Age-related alterations in body composition, sexual function, mood, cognitive function, sleep, and erythropoiesis occur in conjunction with the declining serum T levels. Similar alterations occur in young androgen-deficient hypogonadal men and are improved with T replacement therapy. Therefore, it is reasonable to posit that age-related androgen deficiency may contribute, at least in part, to the changes in physiological function that occur with aging.

Initial short-term controlled studies of T therapy in small

numbers of healthy older men suggest beneficial effects on body composition, BMD, LDL cholesterol, angina, and exercise-induced cardiac ischemia, and possibly muscle strength, libido, general well-being, and certain aspects of cognitive function. In these studies, there have been no significant adverse effects except for erythrocytosis requiring a reduction in dose in some men. Given these findings, it is reasonable to consider T replacement therapy in older men with a clinical syndrome consistent with androgen deficiency and repeatedly low serum-free and bioavailable T levels, in whom the potential benefits of therapy outweigh the potential risks. Because age-related alterations in physiological function are usually a result of multiple etiologies, it is important to evaluate and treat other factors (e.g., inadequate nutritional intake, confounding illness and medication, inactivity or poor conditioning, excessive alcohol, and smoking) in addition to low T levels that may contribute to the clinical syndrome.

A major caveat in treating older men with T is that long-term benefits on fracture incidence, onset of dementia, major cardiovascular outcomes, physical function, frailty and quality of life, and risks of clinical prostate disease (BPH and prostate cancer) and cardiovascular disease are not known. Therefore, routine T treatment of older men cannot be recommended. The balance of benefits and risks of T therapy in older men with low T levels needs to be determined in carefully designed, large, long-term, randomized, placebo-controlled studies. Until the results of these studies are available, practitioners must rely on sound clinical judgment in managing older men with symptoms and signs of andropause. At present, the most prudent course of action is to treat only older men with repeatedly low serum T levels and symptoms and signs consistent with androgen deficiency in whom the potential benefits of therapy clearly outweigh the potential risks, and to carefully monitor treated men for adverse effects. Attention to appropriate exercise and nutrition, and evaluation and treatment of other etiological factors that may contribute to clinical manifestations are essential for optimal management of age-related functional decline in older men.

## ACKNOWLEDGMENTS

This work was supported by the Department of Veterans Affairs Medical funds and NIH Grant HD12629.

Address correspondence to Alvin M. Matsumoto, MD, V.A. Puget Sound Health Care System, 1660 South Columbian Way (S-182-GRECC), Seattle, WA 98108-1597. E-mail: alvin.matsumoto@med.va.gov

## REFERENCES

1. Matsumoto AM. 'Andropause'—are reduced androgen levels in aging men physiologically important? *West J Med.* 1993;159:618–620.
2. Morley JE, Kaiser FE, Sih R, Hajjar R, Perry HM III. Testosterone and frailty. *Clin Geriatr Med.* 1997;13:685–695.
3. Snyder PJ. Effects of age on testicular function and consequences of testosterone treatment. *J Clin Endocrinol Metab.* 2001;86:2369–2372.
4. Swerdloff RS, Wang C. Androgens and aging in men. *Exp Gerontol.* 1993;28:435–446.
5. Vermeulen A. Clinical review 24: androgens in the aging male. *J Clin Endocrinol Metab.* 1991;73:221–224.
6. Abbasi A, Mattson DE, Cuisinier M, et al. Hyposomatomedinemia and hypogonadism in hemiplegic men who live in nursing homes. *Arch Phys Med Rehabil.* 1994;75:594–599.

7. Abbasi AA, Drinka PJ, Mattson DE, Rudman D. Low circulating levels of insulin-like growth factors and testosterone in chronically institutionalized elderly men. *J Am Geriatr Soc.* 1993;41:975–982.
8. Blackman MR, Weintraub BD, Rosen SW, Harman SM. Comparison of the effects of lung cancer, benign lung disease, and normal aging on pituitary-gonadal function in men. *J Clin Endocrinol Metab.* 1988;66:88–95.
9. Kosasih JB, Abbasi AA, Rudman D. Serum insulin-like growth factor-I and serum testosterone status of elderly men in an inpatient rehabilitation unit. *Am J Med Sci.* 1996;311:169–173.
10. Rudman D, Mattson DE, Nagraj HS, Feller AG, Jackson DL, Rudman IW. Plasma testosterone in nursing home men. *J Clin Epidemiol.* 1988;41:231–236.
11. Spratt DI, Cox P, Orav J, Moloney J, Bigos T. Reproductive axis suppression in acute illness is related to disease severity. *J Clin Endocrinol Metab.* 1993;76:1548–1554.
12. Turner HE, Wass JA. Gonadal function in men with chronic illness. *Clin Endocrinol (Oxf).* 1997;47:379–403.
13. Vermeulen A, Kaufman JM, Giagulli VA. Influence of some biological indexes on sex hormone-binding globulin and androgen levels in aging or obese males. *J Clin Endocrinol Metab.* 1996;81:1821–1826.
14. Lamberts SW, van den Beld AW, van der Lely AJ. The endocrinology of aging. *Science.* 1997;278:419–424.
15. Matsumoto AM. Physical, metabolic and endocrine correlates of male aging. In: Filicori M, ed. *Endocrine Basis of Reproductive Function.* Bologna, Italy: Monduzzi Editore; 2000:525–535.
16. Morley JE, Kaiser F, Raum WJ, et al. Potentially predictive and manipulable blood serum correlates of aging in the healthy human male: progressive decreases in bioavailable testosterone, dehydroepiandrosterone sulfate, and the ratio of insulin-like growth factor 1 to growth hormone. *Proc Natl Acad Sci USA.* 1997;94:7537–7542.
17. van den Beld AW, Lamberts SW. The male climacterium: clinical signs and symptoms of a changing endocrine environment. *Prostate Suppl.* 2000;10:2–8.
18. Zumoff B, Strain GW, Kream J, et al. Age variation of the 24-hour mean plasma concentrations of androgens, estrogens, and gonadotropins in normal adult men. *J Clin Endocrinol Metab.* 1982;54:534–538.
19. Baker HW, Burger HG, de Kretser DM, et al. Changes in the pituitary-testicular system with age. *Clin Endocrinol (Oxf).* 1976;5:349–372.
20. Bartsch W. Interrelationships between sex hormone-binding globulin and testosterone, 5 alpha-dihydrotestosterone and oestradiol-17 beta in blood of normal men. *Maturitas.* 1980;2:109–118.
21. Deslypere JP, Vermeulen A. Leydig cell function in normal men: effect of age, life-style, residence, diet, and activity. *J Clin Endocrinol Metab.* 1984;59:955–962.
22. Ferrini RL, Barrett-Connor E. Sex hormones and age: a cross-sectional study of testosterone and estradiol and their bioavailable fractions in community-dwelling men. *Am J Epidemiol.* 1998;147:750–754.
23. Gray A, Berlin JA, McKinlay JB, Longcope C. An examination of research design effects on the association of testosterone and male aging: results of a meta-analysis. *J Clin Epidemiol.* 1991;44:671–684.
24. Gray A, Feldman HA, McKinlay JB, Longcope C. Age, disease, and changing sex hormone levels in middle-aged men: results of the Massachusetts Male Aging Study. *J Clin Endocrinol Metab.* 1991;73:1016–1025.
25. Harman SM, Tsitouras PD. Reproductive hormones in aging men. I. Measurement of sex steroids, basal luteinizing hormone, and Leydig cell response to human chorionic gonadotropin. *J Clin Endocrinol Metab.* 1980;51:35–40.
26. Leifke E, Gorenou V, Wichers C, Von Zur Muhlen A, Von Buren E, Brabant G. Age-related changes of serum sex hormones, insulin-like growth factor-I and sex-hormone binding globulin levels in men: cross-sectional data from a healthy male cohort. *Clin Endocrinol (Oxf).* 2000;53:689–695.
27. Nankin HR, Calkins JH. Decreased bioavailable testosterone in aging normal and impotent men. *J Clin Endocrinol Metab.* 1986;63:1418–1420.
28. Nieschlag E, Lammers U, Freischem CW, Langer K, Wickings EJ. Reproductive functions in young fathers and grandfathers. *J Clin Endocrinol Metab.* 1982;55:676–681.
29. Pirke KM, Doerr P. Age related changes in free plasma testosterone, dihydrotestosterone and oestradiol. *Acta Endocrinol (Copenh).* 1975;80:171–178.
30. Purifoy FE, Koopmans LH, Mayes DM. Age differences in serum androgen levels in normal adult males. *Hum Biol.* 1981;53:499–511.
31. Simon D, Charles MA, Nahoul K, et al. Association between plasma total testosterone and cardiovascular risk factors in healthy adult men: the Telecom Study. *J Clin Endocrinol Metab.* 1997;82:682–685.
32. Sparrow D, Bosse R, Rowe JW. The influence of age, alcohol consumption, and body build on gonadal function in men. *J Clin Endocrinol Metab.* 1980;51:508–512.
33. Tenover JS, Matsumoto AM, Plymate SR, Bremner WJ. The effects of aging in normal men on bioavailable testosterone and luteinizing hormone secretion: response to clomiphene citrate. *J Clin Endocrinol Metab.* 1987;65:1118–1126.
34. Belanger A, Candas B, Dupont A, et al. Changes in serum concentrations of conjugated and unconjugated steroids in 40- to 80-year-old men. *J Clin Endocrinol Metab.* 1994;79:1086–1090.
35. Vermeulen A, Rubens R, Verdonck L. Testosterone secretion and metabolism in male senescence. *J Clin Endocrinol Metab.* 1972;34:730–735.
36. Nahoul K, Roger M. Age-related decline of plasma bioavailable testosterone in adult men. *J Steroid Biochem.* 1990;35:293–299.
37. Drafta D, Schindler AE, Stroe E, Neacsu E. Age-related changes of plasma steroids in normal adult males. *J Steroid Biochem.* 1982;17:683–687.
38. Simon D, Preziosi P, Barrett-Connor E, et al. The influence of aging on plasma sex hormones in men: the Telecom Study. *Am J Epidemiol.* 1992;135:783–791.
39. Harman SM, Metter EJ, Tobin JD, Pearson J, Blackman MR. Longitudinal effects of aging on serum total and free testosterone levels in healthy men. Baltimore Longitudinal Study of Aging. *J Clin Endocrinol Metab.* 2001;86:724–731.
40. Krithivas K, Yurgalevitch SM, Mohr BA, et al. Evidence that the CAG repeat in the androgen receptor gene is associated with the age-related decline in serum androgen levels in men. *J Endocrinol.* 1999;162:137–142.
41. Morley JE, Kaiser FE, Perry HM III, et al. Longitudinal changes in testosterone, luteinizing hormone, and follicle-stimulating hormone in healthy older men. *Metabolism.* 1997;46:410–413.
42. Zmuda JM, Cauley JA, Kriska A, Glynn NW, Gutai JP, Kuller LH. Longitudinal relation between endogenous testosterone and cardiovascular disease risk factors in middle-aged men. A 13-year follow-up of former Multiple Risk Factor Intervention Trial participants. *Am J Epidemiol.* 1997;146:609–617.
43. Kaufman JM, Vermeulen A. Declining gonadal function in elderly men. *Baillieres Clin Endocrinol Metab.* 1997;11:289–309.
44. Tenover JL. Effects of androgen supplementation in the aging male. In: Oddens B, Vermeulen A, eds. *Androgens and the Aging Male.* Pearl River, NY: Parthenon Publishing Group; 1996:191–204.
45. Dunn JF, Nisula BC, Rodbard D. Transport of steroid hormones: binding of 21 endogenous steroids to both testosterone-binding globulin and corticosteroid-binding globulin in human plasma. *J Clin Endocrinol Metab.* 1981;53:58–68.
46. Rosner W. The functions of corticosteroid-binding globulin and sex hormone-binding globulin: recent advances. *Endocr Rev.* 1990;11:80–91.
47. Rosner W. Plasma steroid-binding proteins. *Endocrinol Metab Clin North Am.* 1991;20:697–720.
48. Stearns EL, MacDonnell JA, Kaufman BJ, et al. Declining testicular function with age. Hormonal and clinical correlates. *Am J Med.* 1974;57:761–766.
49. Morley JE, Charlton E, Patrick P, et al. Validation of a screening questionnaire for androgen deficiency in aging males. *Metabolism.* 2000;49:1239–1242.
50. Manni A, Partridge WM, Cefalu W, et al. Bioavailability of albumin-bound testosterone. *J Clin Endocrinol Metab.* 1985;61:705–710.
51. Matsumoto AM. The testis. In: Felig P, Frohman LA, eds. *Endocrinology and Metabolism*, 4th ed. New York: McGraw-Hill; 2001:635–705.

52. Vermeulen A, Verdonck L, Kaufman JM. A critical evaluation of simple methods for the estimation of free testosterone in serum. *J Clin Endocrinol Metab.* 1999;84:3666–3672.
53. Rosner W. Errors in the measurement of plasma free testosterone. *J Clin Endocrinol Metab.* 1997;82:2014–2015.
54. Giraudi G, Cenderelli G, Migliardi M. Effect of tracer binding to serum proteins on the reliability of a direct free testosterone assay. *Steroids.* 1988;52:423–424.
55. Rosner W. An extraordinarily inaccurate assay for free testosterone is still with us. *J Clin Endocrinol Metab.* 2001;86:2903.
56. Winters SJ, Kelley DE, Goodpaster B. The analog free testosterone assay: are the results in men clinically useful? *Clin Chem.* 1998;44:2178–2182.
57. Haji M, Tanaka S, Nishi Y, et al. Sertoli cell function declines earlier than Leydig cell function in aging Japanese men. *Maturitas.* 1994;18:143–153.
58. Neaves WB, Johnson L, Porter JC, Parker CR Jr, Petty CS. Leydig cell numbers, daily sperm production, and serum gonadotropin levels in aging men. *J Clin Endocrinol Metab.* 1984;59:756–763.
59. Kaler LW, Neaves WB. Attrition of the human Leydig cell population with advancing age. *Anat Rec.* 1978;192:513–518.
60. Pirke KM, Sintermann R, Vogt HJ. Testosterone and testosterone precursors in the spermatic vein and in the testicular tissue of old men. Reduced oxygen supply may explain the relative increase of testicular progesterone and 17 alpha-hydroxyprogesterone content and production in old age. *Gerontology.* 1980;26:221–230.
61. Takahashi J, Higashi Y, LaNasa JA, et al. Studies of the human testis. XVIII. Simultaneous measurement of nine intratesticular steroids: evidence for reduced mitochondrial function in testis of elderly men. *J Clin Endocrinol Metab.* 1983;56:1178–1187.
62. Longcope C. The effect of human chorionic gonadotropin on plasma steroid levels in young and old men. *Steroids.* 1973;21:583–592.
63. Muroño EP, Nankin HR, Lin T, Osterman J. The aging Leydig cell. VI. Response of testosterone precursors to gonadotrophin in men. *Acta Endocrinol (Copenh).* 1982;100:455–461.
64. Nankin HR, Lin T, Muroño EP, Osterman J. The aging Leydig cell. III. Gonadotropin stimulation in man. *J Androl.* 1981;2:181–189.
65. Nankin HR, Muroño E, Lin T, Osterman J. Morning and evening human Leydig cell responses to hCG. *Acta Endocrinol (Copenh).* 1980;95:560–565.
66. Rubens R, Dhont M, Vermeulen A. Further studies on Leydig cell function in old age. *J Clin Endocrinol Metab.* 1974;39:40–45.
67. Bremner WJ, Vitiello MV, Prinz PN. Loss of circadian rhythmicity in blood testosterone levels with aging in normal men. *J Clin Endocrinol Metab.* 1983;56:1278–1281.
68. Marrama P, Carani C, Baraghini GF, et al. Circadian rhythm of testosterone and prolactin in the ageing. *Maturitas.* 1982;4:131–138.
69. Montanini V, Simoni M, Chioffi G, et al. Age-related changes in plasma dehydroepiandrosterone sulphate, cortisol, testosterone and free testosterone circadian rhythms in adult men. *Horm Res.* 1988;29:1–6.
70. Muroño EP, Nankin HR, Lin T, Osterman J. The aging Leydig cell V. Diurnal rhythms in aged men. *Acta Endocrinol (Copenh).* 1982;99:619–623.
71. Tenover JS, Matsumoto AM, Clifton DK, Bremner WJ. Age-related alterations in the circadian rhythms of pulsatile luteinizing hormone and testosterone secretion in healthy men. *J Gerontol Med Sci.* 1988;43:M163–M169.
72. Plymate SR, Tenover JS, Bremner WJ. Circadian variation in testosterone, sex hormone-binding globulin, and calculated non-sex hormone-binding globulin bound testosterone in healthy young and elderly men. *J Androl.* 1989;10:366–371.
73. Johnson L, Grumbles JS, Bagheri A, Petty CS. Increased germ cell degeneration during postprophase of meiosis is related to increased serum follicle-stimulating hormone concentrations and reduced daily sperm production in aged men. *Biol Reprod.* 1990;42:281–287.
74. Neaves WB, Johnson L, Petty CS. Seminiferous tubules and daily sperm production in older adult men with varied numbers of Leydig cells. *Biol Reprod.* 1987;36:301–308.
75. Schwartz D, Mayaux MJ, Spira A, et al. Semen characteristics as a function of age in 833 fertile men. *Fertil Steril.* 1983;39:530–535.
76. Gallardo E, Simon C, Levy M, Guanes PP, Remohi J, Pellicer A. Effect of age on sperm fertility potential: oocyte donation as a model. *Fertil Steril.* 1996;66:260–264.
77. Rolf C, Behre HM, Nieschlag E. Reproductive parameters of older compared to younger men of infertile couples. *Int J Androl.* 1996;19:135–142.
78. Silber SJ. Effects of age on male fertility. *Semin Reprod Endocrinol.* 1991;9:241–248.
79. Plas E, Berger P, Hermann M, Pfluger H. Effects of aging on male fertility? *Exp Gerontol.* 2000;35:543–551.
80. McKinlay JD, Feldman MA. Age related variation in sexual activity and interest in normal men: results of the Massachusetts Male Aging Study. In: Rossi AJ, ed. *Sexuality Across the Life Course.* Chicago, IL: The University of Chicago Press; 1994:231–236.
81. Rolf C, Nieschlag E. Reproductive functions, fertility and genetic risks of ageing men. *Exp Clin Endocrinol Diabetes.* 2001;109:68–74.
82. Johnson L, Zane RS, Petty CS, Neaves WB. Quantification of the human Sertoli cell population: its distribution, relation to germ cell numbers, and age-related decline. *Biol Reprod.* 1984;31:785–795.
83. Mahmoud AM, Goemaere S, De Bacquer D, Comhaire FH, Kaufman JM. Serum inhibin B levels in community-dwelling elderly men. *Clin Endocrinol (Oxf).* 2000;53:141–147.
84. Tenover JS, McLachlan RI, Dahl KD, Burger HG, de Kretser DM, Bremner WJ. Decreased serum inhibin levels in normal elderly men: evidence for a decline in Sertoli cell function with aging. *J Clin Endocrinol Metab.* 1988;67:455–459.
85. Harman SM, Tsitouras PD, Costa PT, Blackman MR. Reproductive hormones in aging men. II. Basal pituitary gonadotropins and gonadotropin responses to luteinizing hormone-releasing hormone. *J Clin Endocrinol Metab.* 1982;54:547–551.
86. Kaiser FE, Morley JE. Gonadotropins, testosterone, and the aging male. *Neurobiol Aging.* 1994;15:559–563.
87. Marrama P, Montanini V, Celani MF, et al. Further studies on basal immunoreactive luteinizing hormone (LH), serum testosterone and pituitary responsiveness to luteinizing hormone releasing hormone (LH–RH) in elderly men. *Minerva Endocrinol.* 1984;9:1–6.
88. Korenman SG, Morley JE, Mooradian AD, et al. Secondary hypogonadism in older men: its relation to impotence. *J Clin Endocrinol Metab.* 1990;71:963–969.
89. Matsumoto AM, Bremner WJ. Modulation of pulsatile gonadotropin secretion by testosterone in man. *J Clin Endocrinol Metab.* 1984;58:609–614.
90. Winters SJ, Troen P. A reexamination of pulsatile luteinizing hormone secretion in primary testicular failure. *J Clin Endocrinol Metab.* 1983;57:432–435.
91. Deslypere JP, Kaufman JM, Vermeulen T, Vogelaers D, Vandalem JL, Vermeulen A. Influence of age on pulsatile luteinizing hormone release and responsiveness of the gonadotrophs to sex hormone feedback in men. *J Clin Endocrinol Metab.* 1987;64:68–73.
92. Kaufman JM, Deslypere JP, Giri M, Vermeulen A. Neuroendocrine regulation of pulsatile luteinizing hormone secretion in elderly men. *J Steroid Biochem Mol Biol.* 1990;37:421–430.
93. Pincus SM, Mulligan T, Iranmanesh A, Gheorghiu S, Godschalk M, Veldhuis JD. Older males secrete luteinizing hormone and testosterone more irregularly, and jointly more asynchronously, than younger males. *Proc Natl Acad Sci USA.* 1996;93:14100–14105.
94. Tenover JS, Bremner WJ. The effects of normal aging on the response of the pituitary-gonadal axis to chronic clomiphene administration in men. *J Androl.* 1991;12:258–263.
95. Urban RJ, Veldhuis JD, Blizzard RM, Dufau ML. Attenuated release of biologically active luteinizing hormone in healthy aging men. *J Clin Invest.* 1988;81:1020–1029.
96. Veldhuis JD, Urban RJ, Lizarralde G, Johnson ML, Iranmanesh A. Attenuation of luteinizing hormone secretory burst amplitude as a proximate basis for the hypoandrogenism of healthy aging in men. *J Clin Endocrinol Metab.* 1992;75:707–713.
97. Vermeulen A, Deslypere JP, Kaufman JM. Influence of antiopioids on luteinizing hormone pulsatility in aging men. *J Clin Endocrinol Metab.* 1989;68:68–72.
98. Vermeulen A, Kaufman JM, Deslypere JP, Thomas G. Attenuated luteinizing hormone (LH) pulse amplitude but normal LH pulse frequency, and its relation to plasma androgens in hypogonadism of obese men. *J Clin Endocrinol Metab.* 1993;76:1140–1146.
99. Urban RJ, Dahl KD, Lippert MC, Veldhuis JD. Modulation of immunoradiometric and bioactive follicle stimulating hormone secretion

- and clearance in young and elderly men during treatment with tamoxifen or flutamide. *J Androl.* 1992;13:579–586.
100. Veldhuis JD, Iranmanesh A, Demers LM, Mulligan T. Joint basal and pulsatile hypersecretory mechanisms drive the monotropic follicle-stimulating hormone (FSH) elevation in healthy older men: concurrent preservation of the orderliness of the FSH release process: a general clinical research center study. *J Clin Endocrinol Metab.* 1999;84:3506–3514.
  101. Veldhuis JD, Iranmanesh A, Mulligan T, Pincus SM. Disruption of the young-adult synchrony between luteinizing hormone release and oscillations in follicle-stimulating hormone, prolactin, and nocturnal penile tumescence (NPT) in healthy older men. *J Clin Endocrinol Metab.* 1999;84:3498–3505.
  102. Mikuma N, Kumamoto Y, Maruta H, Nitta T. Role of the hypothalamic opioidergic system in the control of gonadotropin secretion in elderly men. *Andrologia.* 1994;26:39–45.
  103. Veldhuis JD, Iranmanesh A, Samojlik E, Urban RJ. Differential sex steroid negative feedback regulation of pulsatile follicle-stimulating hormone secretion in healthy older men: deconvolution analysis and steady-state sex-steroid hormone infusions in frequently sampled healthy older individuals. *J Clin Endocrinol Metab.* 1997;82:1248–1254.
  104. Winters SJ, Atkinson L. Serum LH concentrations in hypogonadal men during transdermal testosterone replacement through scrotal skin: further evidence that ageing enhances testosterone negative feedback. The Testoderm Study Group. *Clin Endocrinol (Oxf).* 1997;47:317–322.
  105. Winters SJ, Sherins RJ, Troen P. The gonadotropin-suppressive activity of androgen is increased in elderly men. *Metabolism.* 1984;33:1052–1059.
  106. Veldhuis JD, Urban RJ, Dufau ML. Differential responses of biologically active luteinizing hormone secretion in older versus young men to interruption of androgen negative feedback. *J Clin Endocrinol Metab.* 1994;79:1763–1770.
  107. Veldhuis JD, Zwart A, Mulligan T, Iranmanesh A. Muting of androgen negative feedback unveils impoverished gonadotropin-releasing hormone/luteinizing hormone secretory reactivity in healthy older men. *J Clin Endocrinol Metab.* 2001;86:529–535.
  108. Winters SJ, Troen P. Episodic luteinizing hormone (LH) secretion and the response of LH and follicle-stimulating hormone to LH-releasing hormone in aged men: evidence for coexistent primary testicular insufficiency and an impairment in gonadotropin secretion. *J Clin Endocrinol Metab.* 1982;55:560–565.
  109. Kaufman JM, Giri M, Deslypere JM, Thomas G, Vermeulen A. Influence of age on the responsiveness of the gonadotrophs to luteinizing hormone-releasing hormone in males. *J Clin Endocrinol Metab.* 1991;72:1255–1260.
  110. Celani MF, Montanini V, Baraghini GF, Carani C, Marrama P. Effects of acute stimulation with gonadotropin releasing hormone (GnRH) on biologically active serum luteinizing hormone (LH) in elderly men. *J Endocrinol Invest.* 1984;7:589–595.
  111. Mulligan T, Iranmanesh A, Kerzner R, Demers LW, Veldhuis JD. Two-week pulsatile gonadotropin releasing hormone infusion unmasks dual (hypothalamic and Leydig cell) defects in the healthy aging male gonadotropic axis. *Eur J Endocrinol.* 1999;141:257–266.
  112. Ono K, Haji M, Nawata H, Maki T, Kato K, Ibayashi H. Age-related changes in glucocorticoid and androgen receptors of cultured human pubic skin fibroblasts. *Gerontology.* 1988;34:128–133.
  113. Tohgi H, Utsugisawa K, Yamagata M, Yoshimura M. Effects of age on messenger RNA expression of glucocorticoid, thyroid hormone, androgen, and estrogen receptors in postmortem human hippocampus. *Brain Res.* 1995;700:245–253.
  114. Roehrborn CG, Lange JL, George FW, Wilson JD. Changes in amount and intracellular distribution of androgen receptor in human foreskin as a function of age. *J Clin Invest.* 1987;79:44–47.
  115. Bonnet P, Reiter E, Bruyinx M, et al. Benign prostatic hyperplasia and normal prostate aging: differences in types I and II 5 alpha-reductase and steroid hormone receptor messenger ribonucleic acid (mRNA) levels, but not in insulin-like growth factor mRNA levels. *J Clin Endocrinol Metab.* 1993;77:1203–1208.
  116. Grimaldo JI, Meikle AW. Increased levels of nuclear androgen receptors in hyperplastic prostate of aging men. *J Steroid Biochem.* 1984;21:147–150.
  117. Sanchez-Visconti G, Herrero L, Rabadan M, Pereira I, Ruiz-Torres A. Ageing and prostate: age-related changes in androgen receptors of epithelial cells from benign hypertrophic glands compared with cancer. *Mech Ageing Dev.* 1995;82:19–29.
  118. Beilin J, Ball EM, Favaloro JM, Zajac JD. Effect of the androgen receptor CAG repeat polymorphism on transcriptional activity: specificity in prostate and non-prostate cell lines. *J Mol Endocrinol.* 2000;25:85–96.
  119. Giovannucci E, Platz EA, Stampfer MJ, et al. The CAG repeat within the androgen receptor gene and benign prostatic hyperplasia. *Urology.* 1999;53:121–125.
  120. Giovannucci E, Stampfer MJ, Chan A, et al. CAG repeat within the androgen receptor gene and incidence of surgery for benign prostatic hyperplasia in U.S. physicians. *Prostate.* 1999;39:130–134.
  121. Giovannucci E, Stampfer MJ, Krithivas K, et al. The CAG repeat within the androgen receptor gene and its relationship to prostate cancer. *Proc Natl Acad Sci USA.* 1997;94:3320–3323.
  122. Hakimi JM, Schoenberg MP, Rondinelli RH, Piantadosi S, Barrack ER. Androgen receptor variants with short glutamine or glycine repeats may identify unique subpopulations of men with prostate cancer. *Clin Cancer Res.* 1997;3:1599–1608.
  123. Mitsumori K, Terai A, Oka H, et al. Androgen receptor CAG repeat length polymorphism in benign prostatic hyperplasia (BPH): correlation with adenoma growth. *Prostate.* 1999;41:253–257.
  124. Xue W, Irvine RA, Yu MC, Ross RK, Coetzee GA, Ingles SA. Susceptibility to prostate cancer: interaction between genotypes at the androgen receptor and prostate-specific antigen loci. *Cancer Res.* 2000;60:839–841.
  125. Stanford JL, Just JJ, Gibbs M, et al. Polymorphic repeats in the androgen receptor gene: molecular markers of prostate cancer risk. *Cancer Res.* 1997;57:1194–1198.
  126. Bratt O, Borg A, Kristoffersson U, Lundgren R, Zhang QX, Olsson H. CAG repeat length in the androgen receptor gene is related to age at diagnosis of prostate cancer and response to endocrine therapy, but not to prostate cancer risk. *Br J Cancer.* 1999;81:672–676.
  127. Edwards SM, Badzioch MD, Minter R, et al. Androgen receptor polymorphisms: association with prostate cancer risk, relapse and overall survival. *Int J Cancer.* 1999;84:458–465.
  128. Hardy DO, Scher HI, Bogenreider T, et al. Androgen receptor CAG repeat lengths in prostate cancer: correlation with age of onset. *J Clin Endocrinol Metab.* 1996;81:4400–4405.
  129. Nam RK, Elhaji Y, Krahn MD, et al. Significance of the CAG repeat polymorphism of the androgen receptor gene in prostate cancer progression. *J Urol.* 2000;164:567–572.
  130. Lamb DJ, Weigel NL, Marcelli M. Androgen receptors and their biology. *Vitam Horm.* 2001;62:199–230.
  131. Roy AK, Lavrovsky Y, Song CS, et al. Regulation of androgen action. *Vitam Horm.* 1999;55:309–352.
  132. Russell DW, Wilson JD. Steroid 5 alpha-reductase: two genes/two enzymes. *Annu Rev Biochem.* 1994;63:25–61.
  133. Simpson ER. Role of aromatase in sex steroid action. *J Mol Endocrinol.* 2000;25:149–156.
  134. Simpson ER, Zhao Y, Agarwal VR, et al. Aromatase expression in health and disease. *Recent Prog Horm Res.* 1997;52:185–213; discussion 213–214.
  135. Baker HW, Hudson B. Changes in the pituitary-testicular axis with age. *Monogr Endocrinol.* 1983;25:71–83.
  136. Ishimaru T, Pages L, Horton R. Altered metabolism of androgens in elderly men with benign prostatic hyperplasia. *J Clin Endocrinol Metab.* 1977;45:695–701.
  137. Khosla S, Melton LJ III, Atkinson EJ, O'Fallon WM, Klee GG, Riggs BL. Relationship of serum sex steroid levels and bone turnover markers with bone mineral density in men and women: a key role for bioavailable estrogen. *J Clin Endocrinol Metab.* 1998;83:2266–2274.
  138. Labrie F, Belanger A, Cusan L, Gomez JL, Candas B. Marked decline in serum concentrations of adrenal C19 sex steroid precursors and conjugated androgen metabolites during aging. *J Clin Endocrinol Metab.* 1997;82:2396–2402.
  139. van den Beld AW, de Jong FH, Grobbee DE, Pols HA, Lamberts SW. Measures of bioavailable serum testosterone and estradiol and their relationships with muscle strength, bone density, and body composition in elderly men. *J Clin Endocrinol Metab.* 2000;85:3276–3282.



140. Szulc P, Munoz F, Claustrat B, et al. Bioavailable estradiol may be an important determinant of osteoporosis in men: the MINOS study. *J Clin Endocrinol Metab.* 2001;86:192–199.
141. Morimoto I, Edmiston A, Hawks D, Horton R. Studies on the origin of androstenediol and androstenediol glucuronide in young and elderly men. *J Clin Endocrinol Metab.* 1981;52:772–778.
142. Krieg M, Nass R, Tunn S. Effect of aging on endogenous level of 5 alpha-dihydrotestosterone, testosterone, estradiol, and estrone in epithelium and stroma of normal and hyperplastic human prostate. *J Clin Endocrinol Metab.* 1993;77:375–381.
143. Shibata Y, Ito K, Suzuki K, et al. Changes in the endocrine environment of the human prostate transition zone with aging: simultaneous quantitative analysis of prostatic sex steroids and comparison with human prostatic histological composition. *Prostate.* 2000;42:45–55.
144. Tunn S, Hochstrate H, Grunwald I, Fluchter SH, Krieg M. Effect of aging on kinetic parameters of 5 alpha-reductase in epithelium and stroma of normal and hyperplastic human prostate. *J Clin Endocrinol Metab.* 1988;67:979–985.
145. Baker HWG. Testicular dysfunction in systemic disease. In: Becker KL, ed. *Principles and Practice of Endocrinology and Metabolism*, 3rd ed. Philadelphia, PA: Lippincott Williams & Wilkins; 2001: 1150–1158.
146. Nierman DM, Mechanick JI. Hypotestosteronemia in chronically critically ill men. *Crit Care Med.* 1999;27:2418–2421.
147. Woolf PD, Hamill RW, McDonald JV, Lee LA, Kelly M. Transient hypogonadotropic hypogonadism caused by critical illness. *J Clin Endocrinol Metab.* 1985;60:444–450.
148. Woolf PD, Hamill RW, McDonald JV, Lee LA, Kelly M. Transient hypogonadotropic hypogonadism after head trauma: effects on steroid precursors and correlation with sympathetic nervous system activity. *Clin Endocrinol (Oxf).* 1986;25:265–274.
149. Nippoldt TB, Nair KS. Is there a case for DHEA replacement? *Baillieres Clin Endocrinol Metab.* 1998;12:507–520.
150. Orentreich N, Brind JL, Vogelmann JH, Andres R, Baldwin H. Long-term longitudinal measurements of plasma dehydroepiandrosterone sulfate in normal men. *J Clin Endocrinol Metab.* 1992;75:1002–1004.
151. Ravaglia G, Forti P, Maioli F, et al. The relationship of dehydroepiandrosterone sulfate (DHEAS) to endocrine-metabolic parameters and functional status in the oldest-old. Results from an Italian study on healthy free-living over-ninety-year-olds. *J Clin Endocrinol Metab.* 1996;81:1173–1178.
152. Zumoff B, Rosenfeld RS, Strain GW, Levin J, Fukushima DK. Sex differences in the twenty-four-hour mean plasma concentrations of dehydroisoandrosterone (DHA) and dehydroisoandrosterone sulfate (DHAS) and the DHA to DHAS ratio in normal adults. *J Clin Endocrinol Metab.* 1980;51:330–333.
153. Baulieu EE, Thomas G, Legrain S, et al. Dehydroepiandrosterone (DHEA), DHEA sulfate, and aging: contribution of the DHEAge Study to a sociobiomedical issue. *Proc Natl Acad Sci USA.* 2000;97: 4279–4284.
154. Morales AJ, Haubrich RH, Hwang JY, Asakura H, Yen SS. The effect of six months treatment with a 100 mg daily dose of dehydroepiandrosterone (DHEA) on circulating sex steroids, body composition and muscle strength in age-advanced men and women. *Clin Endocrinol (Oxf).* 1998;49:421–432.
155. Morales AJ, Nolan JJ, Nelson JC, Yen SS. Effects of replacement dose of dehydroepiandrosterone in men and women of advancing age. *J Clin Endocrinol Metab.* 1994;78:1360–1367.
156. Reiter WJ, Pycha A, Schatzl G, et al. Dehydroepiandrosterone in the treatment of erectile dysfunction: a prospective, double-blind, randomized, placebo-controlled study. *Urology.* 1999;53:590–594; discussion 594–595.
157. Flynn MA, Weaver-Osterholtz D, Sharpe-Timms KL, Allen S, Krause G. Dehydroepiandrosterone replacement in aging humans. *J Clin Endocrinol Metab.* 1999;84:1527–1533.
158. Baumgartner RN, Koehler KM, Gallagher D, et al. Epidemiology of sarcopenia among the elderly in New Mexico. *Am J Epidemiol.* 1998; 147:755–763.
159. Borkan GA, Hulth DE, Gerzof SG, Robbins AH, Silbert CK. Age changes in body composition revealed by computed tomography. *J Gerontol.* 1983;38:673–677.
160. Flynn MA, Nolph GB, Baker AS, Krause G. Aging in humans: a continuous 20-year study of physiologic and dietary parameters. *J Am Coll Nutr.* 1992;11:660–672.
161. Forbes GB. Longitudinal changes in adult fat-free mass: influence of body weight. *Am J Clin Nutr.* 1999;70:1025–1031.
162. Forbes GB, Reina JC. Adult lean body mass declines with age: some longitudinal observations. *Metabolism.* 1970;19:653–663.
163. Frontera WR, Hughes VA, Fielding RA, Fiatarone MA, Evans WJ, Roubenoff R. Aging of skeletal muscle: a 12-yr longitudinal study. *J Appl Physiol.* 2000;88:1321–1326.
164. Frontera WR, Hughes VA, Lutz KJ, Evans WJ. A cross-sectional study of muscle strength and mass in 45- to 78-yr-old men and women. *J Appl Physiol.* 1991;71:644–650.
165. Frontera WR, Suh D, Krivickas LS, Hughes VA, Goldstein R, Roubenoff R. Skeletal muscle fiber quality in older men and women. *Am J Physiol.* 2000;279:C611–C618.
166. Gallagher D, Ruts E, Visser M, et al. Weight stability masks sarcopenia in elderly men and women. *Am J Physiol.* 2000;279:E366–E375.
167. Gallagher D, Visser M, De Meersman RE, et al. Appendicular skeletal muscle mass: effects of age, gender, and ethnicity. *J Appl Physiol.* 1997;83:229–239.
168. Larsson L. Histochemical characteristics of human skeletal muscle during aging. *Acta Physiol Scand.* 1983;117:469–471.
169. Larsson L, Ramamurthy B. Aging-related changes in skeletal muscle. Mechanisms and interventions. *Drugs Aging.* 2000;17:303–316.
170. Lexell J. Human aging, muscle mass, and fiber type composition. *J Gerontol Biol Sci Med Sci.* 1995;50A(Special Issue):11–16.
171. Melton LJ III, Khosla S, Riggs BL. Epidemiology of sarcopenia. *Mayo Clin Proc.* 2000;75:S10–S12; discussion S12–S13.
172. Novak LP. Aging, total body potassium, fat-free mass, and cell mass in males and females between ages 18 and 85 years. *J Gerontol.* 1972;27:438–443.
173. Porter MM, Vandervoort AA, Lexell J. Aging of human muscle: structure, function and adaptability. *Scand J Med Sci Sports.* 1995;5: 129–142.
174. Hakkinen K, Pakarinen A. Muscle strength and serum testosterone, cortisol and SHBG concentrations in middle-aged and elderly men and women. *Acta Physiol Scand.* 1993;148:199–207.
175. Bassey EJ, Fiatarone MA, O'Neill EF, Kelly M, Evans WJ, Lipsitz LA. Leg extensor power and functional performance in very old men and women. *Clin Sci (Colch).* 1992;82:321–327.
176. Harris T. Muscle mass and strength: relation to function in population studies. *J Nutr.* 1997;127:1004S–1006S.
177. Hughes VA, Frontera WR, Wood M, et al. Longitudinal muscle strength changes in older adults: influence of muscle mass, physical activity, and health. *J Gerontol Biol Sci.* 2001;56A:B209–B217.
178. Larsson L, Grimby G, Karlsson J. Muscle strength and speed of movement in relation to age and muscle morphology. *J Appl Physiol.* 1979;46:451–456.
179. Lindle RS, Metter EJ, Lynch NA, et al. Age and gender comparisons of muscle strength in 654 women and men aged 20–93 yr. *J Appl Physiol.* 1997;83:1581–1587.
180. Martin JC, Farrar RP, Wagner BM, Spirduso WW. Maximal power across the lifespan. *J Gerontol Med Sci.* 2000;55A:M311–M316.
181. Fleg JL, Lakatta EG. Role of muscle loss in the age-associated reduction in VO<sub>2</sub> max. *J Appl Physiol.* 1988;65:1147–1151.
182. Lindstrom B, Lexell J, Gerdle B, Downham D. Skeletal muscle fatigue and endurance in young and old men and women. *J Gerontol Biol Sci.* 1997;52A:B59–B66.
183. Meltzer DE. Body-mass dependence of age-related deterioration in human muscular function. *J Appl Physiol.* 1996;80:1149–1155.
184. Morley JE. The aging athlete. *J Gerontol Med Sci.* 2000;55A:M627–M629.
185. Proctor DN, Joyner MJ. Skeletal muscle mass and the reduction of VO<sub>2</sub>max in trained older subjects. *J Appl Physiol.* 1997;82:1411–1415.
186. Rantanen T, Avela J. Leg extension power and walking speed in very old people living independently. *J Gerontol Med Sci.* 1997;52A: M225–M231.
187. Skelton DA, Greig CA, Davies JM, Young A. Strength, power and related functional ability of healthy people aged 65–89 years. *Age Ageing.* 1994;23:371–377.
188. Kannel WB, Cupples LA, Ramaswami R, Stokes J III, Kreger BE,

- Higgins M. Regional obesity and risk of cardiovascular disease; the Framingham Study. *J Clin Epidemiol*. 1991;44:183–190.
189. Kohrt WM, Malley MT, Dalsky GP, Holloszy JO. Body composition of healthy sedentary and trained, young and older men and women. *Med Sci Sports Exerc*. 1992;24:832–837.
  190. Lindblad U, Langer RD, Wingard DL, Thomas RG, Barrett-Connor EL. Metabolic syndrome and ischemic heart disease in elderly men and women. *Am J Epidemiol*. 2001;153:481–489.
  191. Mott JW, Wang J, Thornton JC, Allison DB, Heymsfield SB, Pierson RN Jr. Relation between body fat and age in 4 ethnic groups. *Am J Clin Nutr*. 1999;69:1007–1013.
  192. Silver AJ, Guillen CP, Kahl MJ, Morley JE. Effect of aging on body fat. *J Am Geriatr Soc*. 1993;41:211–213.
  193. Snead DB, Birge SJ, Kohrt WM. Age-related differences in body composition by hydrodensitometry and dual-energy x-ray absorptiometry. *J Appl Physiol*. 1993;74:770–775.
  194. Jacobsen SJ, Goldberg J, Miles TP, Brody JA, Stiers W, Rimm AA. Hip fracture incidence among the old and very old: a population-based study of 745,435 cases. *Am J Public Health*. 1990;80:871–873.
  195. Jones G, Nguyen T, Sambrook P, Kelly PJ, Eisman JA. Progressive loss of bone in the femoral neck in elderly people: longitudinal findings from the Dubbo osteoporosis epidemiology study. *BMJ*. 1994;309:691–695.
  196. Jones G, Nguyen T, Sambrook PN, Kelly PJ, Gilbert C, Eisman JA. Symptomatic fracture incidence in elderly men and women: the Dubbo Osteoporosis Epidemiology Study (DOES). *Osteoporos Int*. 1994;4:277–282.
  197. Melton LJ III, Thorneau TM, Larson DR. Long-term trends in hip fracture prevalence: the influence of hip fracture incidence and survival. *Osteoporos Int*. 1998;8:68–74.
  198. Nguyen TV, Center JR, Sambrook PN, Eisman JA. Risk factors for proximal humerus, forearm, and wrist fractures in elderly men and women: the Dubbo Osteoporosis Epidemiology Study. *Am J Epidemiol*. 2001;153:587–595.
  199. Nguyen TV, Eisman JA, Kelly PJ, Sambrook PN. Risk factors for osteoporotic fractures in elderly men. *Am J Epidemiol*. 1996;144:255–263.
  200. Orwoll ES, Klein RF. Osteoporosis in men. *Endocr Rev*. 1995;16:87–116.
  201. Wishart JM, Need AG, Horowitz M, Morris HA, Nordin BE. Effect of age on bone density and bone turnover in men. *Clin Endocrinol (Oxf)*. 1995;42:141–146.
  202. Branchet MC, Boisson S, Frances C, Robert AM. Skin thickness changes in normal aging skin. *Gerontology*. 1990;36:28–35.
  203. Hall DA, Blackett AD, Zajac AR, Switala S, Airey CM. Changes in skinfold thickness with increasing age. *Age Ageing*. 1981;10:19–23.
  204. Koenig HG, Blazer DG. Epidemiology of geriatric affective disorders. *Clin Geriatr Med*. 1992;8:235–251.
  205. Bortz WM Jr, Wallace DH, Wiley D. Sexual function in 1,202 aging males: differentiating aspects. *J Gerontol Med Sci*. 1999;54A:M237–M241.
  206. Johannes CB, Araujo AB, Feldman HA, Derby CA, Kleinman KP, McKinlay JB. Incidence of erectile dysfunction in men 40 to 69 years old: longitudinal results from the Massachusetts Male Aging Study. *J Urol*. 2000;163:460–463.
  207. Rowland DL, Greenleaf WJ, Dorfman LJ, Davidson JM. Aging and sexual function in men. *Arch Sex Behav*. 1993;22:545–557.
  208. Schiavi RC, Schreiner-Engel P, Mandeli J, Schanzer H, Cohen E. Healthy aging and male sexual function. *Am J Psychiatry*. 1990;147:766–771.
  209. Bosworth HB, Schaie KW, Willis SL. Cognitive and sociodemographic risk factors for mortality in the Seattle Longitudinal Study. *J Gerontol Psych Sci*. 1999;54B:P273–P282.
  210. Schaie KW, Willis SL. Age difference patterns of psychometric intelligence in adulthood: generalizability within and across ability domains. *Psychol Aging*. 1993;8:44–55.
  211. Prinz PN, Vitiello MV, Raskind MA, Thorpy MJ. Geriatrics: sleep disorders and aging. *N Engl J Med*. 1990;323:520–526.
  212. Blackman MR. Age-related alterations in sleep quality and neuroendocrine function: interrelationships and implications. *JAMA*. 2000;284:879–881.
  213. Lipschitz DA, Udupa KB, Milton KY, Thompson CO. Effect of age on hematopoiesis in man. *Blood*. 1984;63:502–509.
  214. Williamson CS. Influence of age and sex on hemoglobin: a spectrophotometric analysis of nine hundred nineteen cases. *Arch Intern Med*. 1916;18:505–515.
  215. Arver S, Dobs AS, Meikle AW, Allen RP, Sanders SW, Mazer NA. Improvement of sexual function in testosterone deficient men treated for 1 year with a permeation enhanced testosterone transdermal system. *J Urol*. 1996;155:1604–1608.
  216. Bancroft J, Wu FC. Changes in erectile responsiveness during androgen replacement therapy. *Arch Sex Behav*. 1983;12:59–66.
  217. Behre HM, Kliesch S, Leifke E, Link TM, Nieschlag E. Long-term effect of testosterone therapy on bone mineral density in hypogonadal men. *J Clin Endocrinol Metab*. 1997;82:2386–2390.
  218. Behre HM, von Eckardstein S, Kliesch S, Nieschlag E. Long-term substitution therapy of hypogonadal men with transscrotal testosterone over 7–10 years. *Clin Endocrinol (Oxf)*. 1999;50:629–635.
  219. Bhasin S. The dose-dependent effects of testosterone on sexual function and on muscle mass and function. *Mayo Clin Proc*. 2000;75:S70–S75; discussion S75–S76.
  220. Bhasin S, Storer TW, Berman N, et al. Testosterone replacement increases fat-free mass and muscle size in hypogonadal men. *J Clin Endocrinol Metab*. 1997;82:407–413.
  221. Brodsky IG, Balagopal P, Nair KS. Effects of testosterone replacement on muscle mass and muscle protein synthesis in hypogonadal men—a clinical research center study. *J Clin Endocrinol Metab*. 1996;81:3469–3475.
  222. Bross R, Casaburi R, Storer TW, Bhasin S. Androgen effects on body composition and muscle function: implications for the use of androgens as anabolic agents in sarcopenic states. *Baillieres Clin Endocrinol Metab*. 1998;12:365–378.
  223. Burris AS, Banks SM, Carter CS, Davidson JM, Sherins RJ. A long-term, prospective study of the physiologic and behavioral effects of hormone replacement in untreated hypogonadal men. *J Androl*. 1992;13:297–304.
  224. Carani C, Granata AR, Bancroft J, Marrama P. The effects of testosterone replacement on nocturnal penile tumescence and rigidity and erectile response to visual erotic stimuli in hypogonadal men. *Psychoneuroendocrinology*. 1995;20:743–753.
  225. Clopper RR, Voorhess ML, MacGillivray MH, Lee PA, Mills B. Psychosexual behavior in hypopituitary men: a controlled comparison of gonadotropin and testosterone replacement. *Psychoneuroendocrinology*. 1993;18:149–161.
  226. Conway AJ, Boylan LM, Howe C, Ross G, Handelsman DJ. Randomized clinical trial of testosterone replacement therapy in hypogonadal men. *Int J Androl*. 1988;11:247–264.
  227. Cunningham GR, Hirshkowitz M, Korenman SG, Karacan I. Testosterone replacement therapy and sleep-related erections in hypogonadal men. *J Clin Endocrinol Metab*. 1990;70:792–797.
  228. Daniell HW, Dunn SR, Ferguson DW, Lomas G, Niazi Z, Stratte PT. Progressive osteoporosis during androgen deprivation therapy for prostate cancer. *J Urol*. 2000;163:181–186.
  229. Davidson JM, Camargo CA, Smith ER. Effects of androgen on sexual behavior in hypogonadal men. *J Clin Endocrinol Metab*. 1979;48:955–958.
  230. Davidson JM, Kwan M, Greenleaf WJ. Hormonal replacement and sexuality in men. *J Clin Endocrinol Metab*. 1982;11:599–623.
  231. Dobs AS, Meikle AW, Arver S, Sanders SW, Caramelli KE, Mazer NA. Pharmacokinetics, efficacy, and safety of a permeation-enhanced testosterone transdermal system in comparison with bi-weekly injections of testosterone enanthate for the treatment of hypogonadal men. *J Clin Endocrinol Metab*. 1999;84:3469–3478.
  232. Finkelstein JS, Klibanski A, Neer RM, et al. Increases in bone density during treatment of men with idiopathic hypogonadotropic hypogonadism. *J Clin Endocrinol Metab*. 1989;69:776–783.
  233. Finkelstein JS, Klibanski A, Neer RM, Greenspan SL, Rosenthal DI, Crowley WF Jr. Osteoporosis in men with idiopathic hypogonadotropic hypogonadism. *Ann Intern Med*. 1987;106:354–361.
  234. Goldray D, Weisman Y, Jaccard N, Merdler C, Chen J, Matzkin H. Decreased bone density in elderly men treated with the gonadotropin-releasing hormone agonist decapeptyl (D-Trp6-GnRH). *J Clin Endocrinol Metab*. 1993;76:288–290.
  235. Greenspan SL, Oppenheim DS, Klibanski A. Importance of gonadal steroids to bone mass in men with hyperprolactinemic hypogonadism. *Ann Intern Med*. 1989;110:526–531.

236. Grinspoon S, Corcoran C, Stanley T, Baaj A, Basgoz N, Klibanski A. Effects of hypogonadism and testosterone administration on depression indices in HIV-infected men. *J Clin Endocrinol Metab.* 2000;85:60–65.
237. Guo CY, Jones TH, Eastell R. Treatment of isolated hypogonadotropic hypogonadism effect on bone mineral density and bone turnover. *J Clin Endocrinol Metab.* 1997;82:658–665.
238. Hamilton JB, Bunch LD, Mestler GE, Imagawa R. Effect of castration in men upon blood sedimentation rate, hematocrit and hemoglobin. *J Clin Endocrinol Metab.* 1964;24:506–511.
239. Isaia G, Mussetta M, Pecchio F, Sciolla A, di Stefano M, Molinatti GM. Effect of testosterone on bone in hypogonadal males. *Maturitas.* 1992;15:47–51.
240. Jain P, Rademaker AW, McVary KT. Testosterone supplementation for erectile dysfunction: results of a meta-analysis. *J Urol.* 2000;164:371–375.
241. Jockenhovel F, Vogel E, Reinhardt W, Reinwein D. Effects of various modes of androgen substitution therapy on erythropoiesis. *Eur J Med Res.* 1997;2:293–298.
242. Katznelson L, Finkelstein JS, Schoenfeld DA, Rosenthal DI, Anderson EJ, Klibanski A. Increase in bone density and lean body mass during testosterone administration in men with acquired hypogonadism. *J Clin Endocrinol Metab.* 1996;81:4358–4365.
243. Kwan M, Greenleaf WJ, Mann J, Crapo L, Davidson JM. The nature of androgen action on male sexuality: a combined laboratory-self-report study on hypogonadal men. *J Clin Endocrinol Metab.* 1983;57:557–562.
244. Leibenluft E, Schmidt PJ, Turner EH, et al. Effects of leuprolide-induced hypogonadism and testosterone replacement on sleep, melatonin, and prolactin secretion in men. *J Clin Endocrinol Metab.* 1997;82:3203–3207.
245. Leifke E, Korner HC, Link TM, Behre HM, Peters PE, Nieschlag E. Effects of testosterone replacement therapy on cortical and trabecular bone mineral density, vertebral body area and paraspinal muscle area in hypogonadal men. *Eur J Endocrinol.* 1998;138:51–58.
246. Margolese HC. The male menopause and mood: testosterone decline and depression in the aging male—is there a link? *J Geriatr Psychiatry Neurol.* 2000;13:93–101.
247. Marin P, Krotkiewski M, Bjorntorp P. Androgen treatment of middle-aged, obese men: effects on metabolism, muscle and adipose tissues. *Eur J Med.* 1992;1:329–336.
248. Mauras N, Hayes V, Welch S, et al. Testosterone deficiency in young men: marked alterations in whole body protein kinetics, strength, and adiposity. *J Clin Endocrinol Metab.* 1998;83:1886–1892.
249. McClure RD, Oses R, Ernest ML. Hypogonadal impotence treated by transdermal testosterone. *Urology.* 1991;37:224–228.
250. Medras M, Jankowska EA, Rogucka E. Effects of long-term testosterone substitutive therapy on bone mineral content in men with hypergonadotrophic hypogonadism. *Andrologia.* 2001;33:47–52.
251. Morales A, Johnston B, Heaton JP, Lundie M. Testosterone supplementation for hypogonadal impotence: assessment of biochemical measures and therapeutic outcomes. *J Urol.* 1997;157:849–854.
252. O'Carroll R, Shapiro C, Bancroft J. Androgens, behaviour and nocturnal erection in hypogonadal men: the effects of varying the replacement dose. *Clin Endocrinol (Oxf).* 1985;23:527–538.
253. Salmimies P, Kockott G, Pirke KM, Vogt HJ, Schill WB. Effects of testosterone replacement on sexual behavior in hypogonadal men. *Arch Sex Behav.* 1982;11:345–353.
254. Seidman SN, Rabkin JG. Testosterone replacement therapy for hypogonadal men with SSRI-refractory depression. *J Affect Disord.* 1998;48:157–161.
255. Snyder PJ, Peachey H, Berlin JA, et al. Effects of testosterone replacement in hypogonadal men. *J Clin Endocrinol Metab.* 2000;85:2670–2677.
256. Stepan JJ, Lachman M, Zverina J, Pacovsky V, Baylink DJ. Castrated men exhibit bone loss: effect of calcitonin treatment on biochemical indices of bone remodeling. *J Clin Endocrinol Metab.* 1989;69:523–527.
257. Tripathy D, Shah P, Lakshmy R, Reddy KS. Effect of testosterone replacement on whole body glucose utilisation and other cardiovascular risk factors in males with idiopathic hypogonadotropic hypogonadism. *Horm Metab Res.* 1998;30:642–645.
258. Wang C, Alexander G, Berman N, et al. Testosterone replacement therapy improves mood in hypogonadal men—a clinical research center study. *J Clin Endocrinol Metab.* 1996;81:3578–3583.
259. Wang C, Eyre DR, Clark R, et al. Sublingual testosterone replacement improves muscle mass and strength, decreases bone resorption, and increases bone formation markers in hypogonadal men—a clinical research center study. *J Clin Endocrinol Metab.* 1996;81:3654–3662.
260. Wang C, Swerdloff RS, Iranmanesh A, et al. Transdermal testosterone gel improves sexual function, mood, muscle strength, and body composition parameters in hypogonadal men. Testosterone Gel Study Group. *J Clin Endocrinol Metab.* 2000;85:2839–2853.
261. Wang C, Swerdloff RS, Iranmanesh A, et al. Effects of transdermal testosterone gel on bone turnover markers and bone mineral density in hypogonadal men. *Clin Endocrinol (Oxf).* 2001;54:739–750.
262. Wu FC, Bancroft J, Davidson DW, Nicol K. The behavioural effects of testosterone undecanoate in adult men with Klinefelter's syndrome: a controlled study. *Clin Endocrinol (Oxf).* 1982;16:489–497.
263. Alexander GM, Swerdloff RS, Wang C, et al. Androgen-behavior correlations in hypogonadal men and eugonadal men. I. Mood and response to auditory sexual stimuli. *Horm Behav.* 1997;31:110–119.
264. Alexander GM, Swerdloff RS, Wang C, et al. Androgen-behavior correlations in hypogonadal men and eugonadal men. II. Cognitive abilities. *Horm Behav.* 1998;33:85–94.
265. Hatano T, Oishi Y, Furuta A, Iwamoto S, Tashiro K. Incidence of bone fracture in patients receiving luteinizing hormone-releasing hormone agonists for prostate cancer. *BJU Int.* 2000;86:449–452.
266. Seidman SN, Spatz E, Rizzo C, Roose SP. Testosterone replacement therapy for hypogonadal men with major depressive disorder: a randomized, placebo-controlled clinical trial. *J Clin Psychiatry.* 2001;62:406–412.
267. Stoch SA, Parker RA, Chen L, et al. Bone loss in men with prostate cancer treated with gonadotropin-releasing hormone agonists. *J Clin Endocrinol Metab.* 2001;86:2787–2791.
268. Warnock JK, Bundren JC, Morris DW. Depressive symptoms associated with gonadotropin-releasing hormone agonists. *Depress Anxiety.* 1998;7:171–177.
269. Baumgartner RN, Waters DL, Gallagher D, Morley JE, Garry PJ. Predictors of skeletal muscle mass in elderly men and women. *Mech Ageing Dev.* 1999;107:123–136.
270. Taaffe DR, Cooper CS, Holloway L, Duret C, Marcus R. Lack of association of anabolic hormone status and muscle strength with regional and whole body bone mineral density in healthy men aged 60–79 years. *Aging (Milano).* 1999;11:4–11.
271. Abbasi AA, Mattson DE, Duthie EH Jr, et al. Predictors of lean body mass and total adipose mass in community-dwelling elderly men and women. *Am J Med Sci.* 1998;315:188–193.
272. Kostka T, Arzac LM, Patricot MC, Berthouze SE, Lacour JR, Bonnefoy M. Leg extensor power and dehydroepiandrosterone sulfate, insulin-like growth factor-I and testosterone in healthy active elderly people. *Eur J Appl Physiol.* 2000;82:83–90.
273. Ongphiphadhanakul B, Rajatanavin R, Chailurkit L, et al. Serum testosterone and its relation to bone mineral density and body composition in normal males. *Clin Endocrinol (Oxf).* 1995;43:727–733.
274. Seidell JC, Bjorntorp P, Sjostrom L, Kvist H, Sannerstedt R. Visceral fat accumulation in men is positively associated with insulin, glucose, and C-peptide levels, but negatively with testosterone levels. *Metabolism.* 1990;39:897–901.
275. Vermeulen A, Goemaere S, Kaufman JM. Testosterone, body composition and aging. *J Endocrinol Invest.* 1999;22:110–116.
276. Khaw KT, Barrett-Connor E. Lower endogenous androgens predict central adiposity in men. *Ann Epidemiol.* 1992;2:675–682.
277. Chang TC, Tung CC, Hsiao YL. Hormonal changes in elderly men with non-insulin-dependent diabetes mellitus and the hormonal relationships to abdominal adiposity. *Gerontology.* 1994;40:260–267.
278. Defay R, Papoz L, Barny S, Bonnot-Lours S, Caces E, Simon D. Hormonal status and NIDDM in the European and Melanesian populations of New Caledonia: a case-control study. The CALedonia DIAbetes Mellitus (CALDIA) Study Group. *Int J Obes Relat Metab Disord.* 1998;22:927–934.
279. Haffner SM, Shaten J, Stern MP, Smith GD, Kuller L. Low levels of sex hormone-binding globulin and testosterone predict the development of non-insulin-dependent diabetes mellitus in men. MRFIT

- Research Group. Multiple Risk Factor Intervention Trial. *Am J Epidemiol*. 1996;143:889–897.
280. Stellato RK, Feldman HA, Hamdy O, Horton ES, McKinlay JB. Testosterone, sex hormone-binding globulin, and the development of type 2 diabetes in middle-aged men: prospective results from the Massachusetts male aging study. *Diabetes Care*. 2000;23:490–494.
  281. Tibblin G, Adlerberth A, Lindstedt G, Bjorntorp P. The pituitary-gonadal axis and health in elderly men: a study of men born in 1913. *Diabetes*. 1996;45:1605–1609.
  282. Andersson B, Marin P, Lissner L, Vermeulen A, Bjorntorp P. Testosterone concentrations in women and men with NIDDM. *Diabetes Care*. 1994;17:405–411.
  283. Vermeulen A. Decreased androgen levels and obesity in men. *Ann Med*. 1996;28:13–15.
  284. Couillard C, Gagnon J, Bergeron J, et al. Contribution of body fatness and adipose tissue distribution to the age variation in plasma steroid hormone concentrations in men: the HERITAGE Family Study. *J Clin Endocrinol Metab*. 2000;85:1026–1031.
  285. Alexandersen P, Haarbo J, Christiansen C. The relationship of natural androgens to coronary heart disease in males: a review. *Atherosclerosis*. 1996;125:1–13.
  286. Bagatell CJ, Bremner WJ. Androgen and progestagen effects on plasma lipids. *Prog Cardiovasc Dis*. 1995;38:255–271.
  287. Barrett-Connor E. Lower endogenous androgen levels and dyslipidemia in men with non-insulin-dependent diabetes mellitus. *Ann Intern Med*. 1992;117:807–811.
  288. Barrett-Connor E, Khaw KT. Endogenous sex hormones and cardiovascular disease in men. A prospective population-based study. *Circulation*. 1988;78:539–545.
  289. Barrett-Connor EL. Testosterone and risk factors for cardiovascular disease in men. *Diabetes Metab*. 1995;21:156–161.
  290. Endre T, Mattiasson I, Berglund G, Hulthen UL. Low testosterone and insulin resistance in hypertension-prone men. *J Hum Hypertens*. 1996;10:755–761.
  291. English KM, Mandour O, Steeds RP, Diver MJ, Jones TH, Channer KS. Men with coronary artery disease have lower levels of androgens than men with normal coronary angiograms. *Eur Heart J*. 2000;21:890–894.
  292. Haffner SM, Valdez RA, Mykkanen L, Stern MP, Katz MS. Decreased testosterone and dehydroepiandrosterone sulfate concentrations are associated with increased insulin and glucose concentrations in nondiabetic men. *Metabolism*. 1994;43:599–603.
  293. Jeppesen LL, Jorgensen HS, Nakayama H, Raaschou HO, Olsen TS, Winther K. Decreased serum testosterone in men with acute ischemic stroke. *Arterioscler Thromb Vasc Biol*. 1996;16:749–754.
  294. Khaw KT, Barrett-Connor E. Blood pressure and endogenous testosterone in men: an inverse relationship. *J Hypertens*. 1988;6:329–332.
  295. Khaw KT, Barrett-Connor E. Endogenous sex hormones, high density lipoprotein cholesterol, and other lipoprotein fractions in men. *Arterioscler Thromb*. 1991;11:489–494.
  296. Phillips GB. Relationship between serum sex hormones and the glucose-insulin-lipid defect in men with obesity. *Metabolism*. 1993;42:116–120.
  297. Phillips GB, Pinkernell BH, Jing TY. The association of hypotestosteronemia with coronary artery disease in men. *Arterioscler Thromb*. 1994;14:701–706.
  298. Simon D, Preziosi P, Barrett-Connor E, et al. Interrelation between plasma testosterone and plasma insulin in healthy adult men: the Telecom Study. *Diabetologia*. 1992;35:173–177.
  299. Chute CG, Baron JA, Plymate SR, et al. Sex hormones and coronary artery disease. *Am J Med*. 1987;83:853–859.
  300. De Pergola G, De Mitrio V, Sciaraffia M, et al. Lower androgenicity is associated with higher plasma levels of prothrombotic factors irrespective of age, obesity, body fat distribution, and related metabolic parameters in men. *Metabolism*. 1997;46:1287–1293.
  301. Freedman DS, O'Brien TR, Flanders WD, DeStefano F, Barboriak JJ. Relation of serum testosterone levels to high density lipoprotein cholesterol and other characteristics in men. *Arterioscler Thromb*. 1991;11:307–315.
  302. Glueck CJ, Glueck HI, Stroop D, Speirs J, Hamer T, Tracy T. Endogenous testosterone, fibrinolysis, and coronary heart disease risk in hyperlipidemic men. *J Lab Clin Med*. 1993;122:412–420.
  303. Kiel DP, Baron JA, Plymate SR, Chute CG. Sex hormones and lipoproteins in men. *Am J Med*. 1989;87:35–39.
  304. Clarke BL, Ebeling PR, Jones JD, et al. Changes in quantitative bone histomorphometry in aging healthy men. *J Clin Endocrinol Metab*. 1996;81:2264–2270.
  305. Foresta C, Ruzza G, Mioni R, et al. Osteoporosis and decline of gonadal function in the elderly male. *Horm Res*. 1984;19:18–22.
  306. Greendale GA, Edelstein S, Barrett-Connor E. Endogenous sex steroids and bone mineral density in older women and men: the Rancho Bernardo Study. *J Bone Miner Res*. 1997;12:1833–1843.
  307. Murphy S, Khaw KT, Cassidy A, Compston JE. Sex hormones and bone mineral density in elderly men. *Bone Int*. 1993;20:133–140.
  308. Ongphiphadhanakul B, Rajatanavin R, Chanprasertyothin S, Piasue N, Chailurkit L. Serum oestradiol and oestrogen-receptor gene polymorphism are associated with bone mineral density independently of serum testosterone in normal males. *Clin Endocrinol (Oxf)*. 1998;49:803–809.
  309. Rudman D, Drinka PJ, Wilson CR, et al. Relations of endogenous anabolic hormones and physical activity to bone mineral density and lean body mass in elderly men. *Clin Endocrinol (Oxf)*. 1994;40:653–661.
  310. Scopacasa F, Horowitz M, Wishart JM, Morris HA, Chatterton BE, Need AG. The relation between bone density, free androgen index, and estradiol in men 60 to 70 years old. *Bone*. 2000;27:145–149.
  311. Amin S, Zhang Y, Sawin CT, et al. Association of hypogonadism and estradiol levels with bone mineral density in elderly men from the Framingham study. *Ann Intern Med*. 2000;133:951–963.
  312. Center JR, Nguyen TV, Sambrook PN, Eisman JA. Hormonal and biochemical parameters and osteoporotic fractures in elderly men. *J Bone Miner Res*. 2000;15:1405–1411.
  313. Drinka PJ, Olson J, Bauwens S, Voeks SK, Carlson I, Wilson M. Lack of association between free testosterone and bone density separate from age in elderly males. *Calcif Tissue Int*. 1993;52:67–69.
  314. Kenny AM, Gallagher JC, Prestwood KM, Gruman CA, Raisz LG. Bone density, bone turnover, and hormone levels in men over age 75. *J Gerontol Med Sci*. 1998;53:M419–M425.
  315. Meier DE, Orwoll ES, Keenan EJ, Fagerstrom RM. Marked decline in trabecular bone mineral content in healthy men with age: lack of association with sex steroid levels. *J Am Geriatr Soc*. 1987;35:189–197.
  316. Nyquist F, Gardsell P, Sernbo I, Jeppsson JO, Johnell O. Assessment of sex hormones and bone mineral density in relation to occurrence of fracture in men: a prospective population-based study. *Bone*. 1998;22:147–151.
  317. Rapado A, Hawkins F, Sobrinho L, et al. Bone mineral density and androgen levels in elderly males. *Calcif Tissue Int*. 1999;65:417–421.
  318. Ravaglia G, Forti P, Maioli F, et al. Body composition, sex steroids, IGF-1, and bone mineral status in aging men. *J Gerontol Med Sci*. 2000;55A:M516–M521.
  319. Martinez Diaz-Guerra G, Hawkins F, Rapado A, Ruiz Diaz MA, Diaz-Curiel M. Hormonal and anthropometric predictors of bone mass in healthy elderly men: major effect of sex hormone binding globulin, parathyroid hormone and body weight. *Osteoporos Int*. 2001;12:178–184.
  320. Barrett-Connor E, Mueller JE, von Muhlen DG, Laughlin GA, Schneider DI, Sartoris DJ. Low levels of estradiol are associated with vertebral fractures in older men, but not women: the Rancho Bernardo Study. *J Clin Endocrinol Metab*. 2000;85:219–223.
  321. Slemenda CW, Longcope C, Zhou L, Hui SL, Peacock M, Johnston CC. Sex steroids and bone mass in older men. Positive associations with serum estrogens and negative associations with androgens. *J Clin Invest*. 1997;100:1755–1759.
  322. Carani C, Qin K, Simoni M, et al. Effect of testosterone and estradiol in a man with aromatase deficiency. *N Engl J Med*. 1997;337:91–95.
  323. Grumbach MM, Auchus RJ. Estrogen: consequences and implications of human mutations in synthesis and action. *J Clin Endocrinol Metab*. 1999;84:4677–4694.
  324. Morishima A, Grumbach MM, Simpson ER, Fisher C, Qin K. Aromatase deficiency in male and female siblings caused by a novel mutation and the physiological role of estrogens. *J Clin Endocrinol Metab*. 1995;80:3689–3698.
  325. Riggs BL, Khosla S, Melton LJ III. A unitary model for involutional osteoporosis: estrogen deficiency causes both type I and type II os-

- teoporosis in postmenopausal women and contributes to bone loss in aging men. *J Bone Miner Res*. 1998;13:763–773.
326. Rochira V, Faustini-Fustini M, Balestrieri A, Carani C. Estrogen replacement therapy in a man with congenital aromatase deficiency: effects of different doses of transdermal estradiol on bone mineral density and hormonal parameters. *J Clin Endocrinol Metab*. 2000;85:1841–1845.
  327. Smith EP, Boyd J, Frank GR, et al. Estrogen resistance caused by a mutation in the estrogen-receptor gene in a man. *N Engl J Med*. 1994;331:1056–1061.
  328. Katz MS. Geriatrics grand rounds: Eve's rib, or a revisionist view of osteoporosis in men. *J Gerontol Med Sci*. 2000;55A:M560–M569.
  329. Taxel P, Kennedy D, Fall P, et al. The effect of short-term treatment with micronized estradiol on bone turnover and gonadotrophins in older men. *Endocr Res*. 2000;26:381–398.
  330. Taxel P, Kennedy DG, Fall PM, Willard AK, Clive JM, Raisz LG. The effect of aromatase inhibition on sex steroids, gonadotropins, and markers of bone turnover in older men. *J Clin Endocrinol Metab*. 2001;86:2869–2874.
  331. Marcus R, Leary D, Schneider DI, Shane E, Favus M, Quigley CA. The contribution of testosterone to skeletal development and maintenance: lessons from the androgen insensitivity syndrome. *J Clin Endocrinol Metab*. 2000;85:1032–1037.
  332. Mizunuma H, Soda M, Okano H, et al. Changes in bone mineral density after orchidectomy and hormone replacement therapy in individuals with androgen insensitivity syndrome. *Hum Reprod*. 1998;13:2816–2818.
  333. Soule SG, Conway G, Prelevic GM, Prentice M, Ginsburg J, Jacobs HS. Osteopenia as a feature of the androgen insensitivity syndrome. *Clin Endocrinol (Oxf)*. 1995;43:671–675.
  334. Falahati-Nini A, Riggs BL, Atkinson EJ, O'Fallon WM, Eastell R, Khosla S. Relative contributions of testosterone and estrogen in regulating bone resorption and formation in normal elderly men. *J Clin Invest*. 2000;106:1553–1560.
  335. Diamond T, Smerdely P, Kormas N, Sekel R, Vu T, Day P. Hip fracture in elderly men: the importance of subclinical vitamin D deficiency and hypogonadism. *Med J Aust*. 1998;169:138–141.
  336. Jackson JA, Riggs MW, Spiekerman AM. Testosterone deficiency as a risk factor for hip fractures in men: a case-control study. *Am J Med Sci*. 1992;304:4–8.
  337. Stanley HL, Schmitt BP, Poses RM, Deiss WP. Does hypogonadism contribute to the occurrence of a minimal trauma hip fracture in elderly men? *J Am Geriatr Soc*. 1991;39:766–771.
  338. Barrett-Connor E, Von Muhlen DG, Kritiz-Silverstein D. Bioavailable testosterone and depressed mood in older men: the Rancho Bernardo Study. *J Clin Endocrinol Metab*. 1999;84:573–577.
  339. Davidson JM, Chen JJ, Crapo L, Gray GD, Greenleaf WJ, Catania JA. Hormonal changes and sexual function in aging men. *J Clin Endocrinol Metab*. 1983;57:71–77.
  340. Granata AR, Rochira V, Lerchl A, Marrama P, Carani C. Relationship between sleep-related erections and testosterone levels in men. *J Androl*. 1997;18:522–527.
  341. Schiavi RC, Fisher C, White D, Beers P, Szechter R. Pituitary-gonadal function during sleep in men with erectile impotence and normal controls. *Psychosom Med*. 1984;46:239–254.
  342. Schiavi RC, Schreiner-Engel P, White D, Mandeli J. Pituitary-gonadal function during sleep in men with hypoactive sexual desire and in normal controls. *Psychosom Med*. 1988;50:304–318.
  343. Schiavi RC, Schreiner-Engel P, White D, Mandeli J. The relationship between pituitary-gonadal function and sexual behavior in healthy aging men. *Psychosom Med*. 1991;53:363–374.
  344. Schiavi RC, White D, Mandeli J, Schreiner-Engel P. Hormones and nocturnal penile tumescence in healthy aging men. *Arch Sex Behav*. 1993;22:207–215.
  345. Tsitouras PD, Martin CE, Harman SM. Relationship of serum testosterone to sexual activity in healthy elderly men. *J Gerontol*. 1982;37:288–293.
  346. Kraemer HC, Becker HB, Brodie HK, Doering CH, Moos RH, Hamburg DA. Orgasmic frequency and plasma testosterone levels in normal human males. *Arch Sex Behav*. 1976;5:125–132.
  347. Bagatell CJ, Heiman JR, Rivier JE, Bremner WJ. Effects of endogenous testosterone and estradiol on sexual behavior in normal young men. *J Clin Endocrinol Metab*. 1994;78:711–716.
  348. Buena F, Swerdloff RS, Steiner BS, et al. Sexual function does not change when serum testosterone levels are pharmacologically varied within the normal male range. *Fertil Steril*. 1993;59:1118–1123.
  349. Kaiser FE, Viosca SP, Morley JE, Mooradian AD, Davis SS, Korenman SG. Impotence and aging: clinical and hormonal factors. *J Am Geriatr Soc*. 1988;36:511–519.
  350. Lue TF. Erectile dysfunction. *N Engl J Med*. 2000;342:1802–1813.
  351. Schiavi RC, White D, Mandeli J. Pituitary-gonadal function during sleep in healthy aging men. *Psychoneuroendocrinology*. 1992;17:599–609.
  352. Nilsson PM, Moller L, Solstad K. Adverse effects of psychosocial stress on gonadal function and insulin levels in middle-aged males. *J Intern Med*. 1995;237:479–486.
  353. Barrett-Connor E, Goodman-Gruen D, Patay B. Endogenous sex hormones and cognitive function in older men. *J Clin Endocrinol Metab*. 1999;84:3681–3685.
  354. Christiansen K. Sex hormone-related variations of cognitive performance in !Kung San hunter-gatherers of Namibia. *Neuropsychobiology*. 1993;27:97–107.
  355. Christiansen K, Knussmann R. Sex hormones and cognitive functioning in men. *Neuropsychobiology*. 1987;18:27–36.
  356. Silverman I, Kastuk D, Choi J, Phillips K. Testosterone levels and spatial ability in men. *Psychoneuroendocrinology*. 1999;24:813–822.
  357. Stenn PG, Klaiber EL, Vogel W, Broverman DM. Testosterone effects upon photic stimulation of the electroencephalogram (EEG) and mental performance of humans. *Percept Mot Skills*. 1972;34:371–378.
  358. Field AE, Colditz GA, Willett WC, Longcope C, McKinlay JB. The relation of smoking, age, relative weight, and dietary intake to serum adrenal steroids, sex hormones, and sex hormone-binding globulin in middle-aged men. *J Clin Endocrinol Metab*. 1994;79:1310–1316.
  359. Vermeulen A. Environment, human reproduction, menopause, and andropause. *Environ Health Perspect*. 1993;101:91–100.
  360. Vermeulen A, Kaufman JM. Ageing of the hypothalamo-pituitary-testicular axis in men. *Horm Res*. 1995;43:25–28.
  361. Harper KD, Weber TJ. Secondary osteoporosis. Diagnostic considerations. *Endocrinol Metab Clin North Am*. 1998;27:325–348.
  362. Weissberger AJ, Ho KK. Activation of the somatotrophic axis by testosterone in adult males: evidence for the role of aromatization. *J Clin Endocrinol Metab*. 1993;76:1407–1412.
  363. Fried LP, Tangen CM, Walston J, et al. Frailty in older adults: evidence for a phenotype. *J Gerontol Med Sci*. 2001;56A:M146–M156.
  364. Hodes RJ. Frailty and disability: can growth hormone or other trophic agents make a difference? *J Am Geriatr Soc*. 1994;42:1208–1211.
  365. Rolf C, Nieschlag E. Potential adverse effects of long-term testosterone therapy. *Baillieres Clin Endocrinol Metab*. 1998;12:521–534.
  366. Fowler JE Jr, Whitmore WF Jr. The response of metastatic adenocarcinoma of the prostate to exogenous testosterone. *J Urol*. 1981;126:372–375.
  367. Breslow N, Chan CW, Dhom G, et al. Latent carcinoma of prostate at autopsy in seven areas. The International Agency for Research on Cancer, Lyons, France. *Int J Cancer*. 1977;20:680–688.
  368. Carter HB, Pearson JD, Metter EJ, et al. Longitudinal evaluation of serum androgen levels in men with and without prostate cancer. *Prostate*. 1995;27:25–31.
  369. de Jong FH, Oishi K, Hayes RB, et al. Peripheral hormone levels in controls and patients with prostatic cancer or benign prostatic hyperplasia: results from the Dutch-Japanese case-control study. *Cancer Res*. 1991;51:3445–3450.
  370. Mohr BA, Feldman HA, Kalish LA, Longcope C, McKinlay JB. Are serum hormones associated with the risk of prostate cancer? Prospective results from the Massachusetts Male Aging Study. *Urology*. 2001;57:930–935.
  371. Gann PH, Hennekens CH, Ma J, Longcope C, Stampfer MJ. Prospective study of sex hormone levels and risk of prostate cancer. *J Natl Cancer Inst*. 1996;88:1118–1126.
  372. Hoffman MA, DeWolf WC, Morgentaler A. Is low serum free testosterone a marker for high grade prostate cancer? *J Urol*. 2000;163:824–827.
  373. Morgentaler A, Bruning CO III, DeWolf WC. Occult prostate cancer in men with low serum testosterone levels. *JAMA*. 1996;276:1904–1906.

374. Catalona WJ, Smith DS, Ornstein DK. Prostate cancer detection in men with serum PSA concentrations of 2.6 to 4.0 ng/mL and benign prostate examination. Enhancement of specificity with free PSA measurements. *JAMA*. 1997;277:1452-1455.
375. Horton R. Benign prostatic hyperplasia: a disorder of androgen metabolism in the male. *J Am Geriatr Soc*. 1984;32:380-385.
376. Horton R. Benign prostatic hyperplasia: new insights. *J Clin Endocrinol Metab*. 1992;74:504A-504C.
377. Behre HM, Bohmeyer J, Nieschlag E. Prostate volume in testosterone-treated and untreated hypogonadal men in comparison to age-matched normal controls. *Clin Endocrinol (Oxf)*. 1994;40:341-349.
378. Meikle AW, Arver S, Dobs AS, et al. Prostate size in hypogonadal men treated with a nonscrotal permeation-enhanced testosterone transdermal system. *Urology*. 1997;49:191-196.
379. Gormley GJ, Stoner E, Bruskevitz RC, et al. The effect of finasteride in men with benign prostatic hyperplasia. The Finasteride Study Group. *N Engl J Med*. 1992;327:1185-1191.
380. Bagatell CJ, Heiman JR, Matsumoto AM, Rivier JE, Bremner WJ. Metabolic and behavioral effects of high-dose, exogenous testosterone in healthy men. *J Clin Endocrinol Metab*. 1994;79:561-567.
381. Bagatell CJ, Knopp RH, Vale WW, Rivier JE, Bremner WJ. Physiologic testosterone levels in normal men suppress high-density lipoprotein cholesterol levels. *Ann Intern Med*. 1992;116:967-973.
382. Goldberg RB, Rabin D, Alexander AN, Doelle GC, Getz GS. Suppression of plasma testosterone leads to an increase in serum total and high density lipoprotein cholesterol and apoproteins A-I and B. *J Clin Endocrinol Metab*. 1985;60:203-207.
383. Jockenhovel F, Bullmann C, Schubert M, et al. Influence of various modes of androgen substitution on serum lipids and lipoproteins in hypogonadal men. *Metabolism*. 1999;48:590-596.
384. Meriggola MC, Marcovina S, Paulsen CA, Bremner WJ. Testosterone enanthate at a dose of 200 mg/week decreases HDL-cholesterol levels in healthy men. *Int J Androl*. 1995;18:237-242.
385. Thompson PD, Cullinane EM, Sady SP, et al. Contrasting effects of testosterone and stanozolol on serum lipoprotein levels. *JAMA*. 1989;261:1165-1168.
386. Supry JK, Chansky HC, Anawalt BA, Matsumoto AM, Bremner WJ. Supraphysiologic androgen administration in elderly men undergoing joint replacement surgery [abstract]. *J Androl (Suppl)*. *Proceedings of the VIIIth International Congress of Andrology; June 15-19, 2001*. San Francisco, CA: American Society of Andrology; 2001:175. Abstract P175/176-084.
387. Bakhshi V, Elliott M, Gentili A, Godschalk M, Mulligan T. Testosterone improves rehabilitation outcomes in ill older men. *J Am Geriatr Soc*. 2000;48:550-553.
388. Bebb RA, Anawalt BA, Wade J, et al. A randomized, double-blind, placebo controlled trial of testosterone undecanoate administration in aging hypogonadal men: effects on bone density and body composition [abstract]. *Proceedings of The Endocrine Society 83rd Annual Meeting; June 20-23, 2001; Denver, CO*. Bethesda, MD: The Endocrine Society; 2001:100. Abstract OR124-105.
389. Benkert O, Witt W, Adam W, Leitz A. Effects of testosterone undecanoate on sexual potency and the hypothalamic-pituitary-gonadal axis of impotent males. *Arch Sex Behav*. 1979;8:471-479.
390. Blackman MR, Christmas C, O'Connor KG, et al. Effects of growth hormone and/or sex steroid administration on body composition in healthy elderly women and men [abstract]. *Proceedings of The Endocrine Society 81st Annual Meeting; June 12-15, 1999; San Diego, CA*. Bethesda, MD: The Endocrine Society; 1999:391. Abstract P392-523.
391. Brill K, Weltman A, Gentili A, et al. Single and joint impact of one-month of transdermal testosterone (T) and/or recombinant human growth hormone (rhGH) supplementation on body composition, strength, balance, function, and muscle IGF-1 and androgen gene expression in healthy older men: a prospective randomized double-blind crossover study [abstract]. *Proceedings of The Endocrine Society 82nd Annual Meeting; June 21-24, 2000; Toronto, Canada*. Bethesda, MD: The Endocrine Society; 2000:389. Abstract 1647.
392. Cherrier MM, Asthana S, Plymate S, et al. Testosterone supplementation improves spatial and verbal memory in healthy older men. *Neurology*. 2001;57:80-88.
393. Christmas C, Harman SM, Munzer T, et al. Effects of growth hormone and/or sex steroid administration on serum lipid profiles in healthy elderly women and men [abstract]. *Proceedings of The Endocrine Society 81st Annual Meeting; June 12-15, 1999; San Diego, CA*. Bethesda, MD: The Endocrine Society; 1999:394. Abstract P392-537.
394. Clague JE, Wu FC, Horan MA. Difficulties in measuring the effect of testosterone replacement therapy on muscle function in older men. *Int J Androl*. 1999;22:261-265.
395. Drinka PJ, Jochen AL, Cuisinier M, Bloom R, Rudman I, Rudman D. Polycythemia as a complication of testosterone replacement therapy in nursing home men with low testosterone levels. *J Am Geriatr Soc*. 1995;43:899-901.
396. Edmond J, Busby-Whitehead MJ, Harman SM, et al. Effects of growth hormone and/or sex steroid administration on aerobic capacity in healthy elderly women and men [abstract]. *Proceedings of The Endocrine Society 81st Annual Meeting; June 12-15, 1999; San Diego, CA*. Bethesda, MD: The Endocrine Society; 1999:392. Abstract P392-P530.
397. English KM, Steeds RP, Jones TH, Diver MJ, Channer KS. Low-dose transdermal testosterone therapy improves angina threshold in men with chronic stable angina: a randomized, double-blind, placebo-controlled study. *Circulation*. 2000;102:1906-1911.
398. Gentili A, Mulligan T, Godschalk M, et al. Testosterone supplementation increases growth hormone secretion in older men [abstract]. *Proceedings of The Endocrine Society 82nd Annual Meeting; June 21-24, 2000; Toronto, Canada*. Bethesda, MD: The Endocrine Society; 2000. p. 470 [Abstract 1944].
399. Harman SM, Pabst KM, Munzer T, et al. Adverse effects observed in healthy women and men over 65 years of age treated with GH and sex steroid hormone replacement [abstract]. *Proceedings of The Endocrine Society 82nd Annual Meeting; June 21-24, 2000; Toronto, Canada*. Bethesda, MD: The Endocrine Society; 2000:395. Abstract 1635.
400. Holmang S, Marin P, Lindstedt G, Hedelin H. Effect of long-term oral testosterone undecanoate treatment on prostate volume and serum prostate-specific antigen concentration in eugonadal middle-aged men. *Prostate*. 1993;23:99-106.
401. Ivey FM, Harman SM, Hurley BF, et al. Effects of GH and/or sex steroid administration on thigh muscle and fat by magnetic resonance imaging (MRI) in healthy elderly men and women [abstract]. *Proceedings of The Endocrine Society 81st Annual Meeting; June 12-15, 1999; San Diego, CA*. Bethesda, MD: The Endocrine Society; 1999:390. Abstract P392-520.
402. Jaffe MD. Effect of testosterone cypionate on postexercise ST segment depression. *Br Heart J*. 1977;39:1217-1222.
403. Janowsky JS, Chavez B, Orwoll E. Sex steroids modify working memory. *J Cogn Neurosci*. 2000;12:407-414.
404. Janowsky JS, Oviatt SK, Orwoll ES. Testosterone influences spatial cognition in older men. *Behav Neurosci*. 1994;108:325-332.
405. Kenny AM, Prestwood KM, Gruman CA, Marcello KM, Raisz LG. Effects of transdermal testosterone on bone and muscle in older men with low bioavailable testosterone levels. *J Gerontol Med Sci*. 2001;56A:M266-M272.
406. Marin P. Androgen treatment of abdominally obese men. *Obes Res*. 1993;1:245-251.
407. Marin P, Oden B, Bjorntorp P. Assimilation and mobilization of triglycerides in subcutaneous abdominal and femoral adipose tissue in vivo in men: effects of androgens. *J Clin Endocrinol Metab*. 1995;80:239-243.
408. Morley JE, Perry HM III, Kaiser FE, et al. Effects of testosterone replacement therapy in old hypogonadal males: a preliminary study. *J Am Geriatr Soc*. 1993;41:149-152.
409. Munzer T, Harman SM, Hees P, et al. Effects of GH and/or sex steroid administration on abdominal subcutaneous and visceral fat in healthy aged women and men. *J Clin Endocrinol Metab*. 2001;86:3604-3610.
410. Nankin HR, Lin T, Osterman J. Chronic testosterone cypionate therapy in men with secondary impotence. *Fertil Steril*. 1986;46:300-307.
411. Ong PJ, Patrizi G, Chong WC, Webb CM, Hayward CS, Collins P. Testosterone enhances flow-mediated brachial artery reactivity in men with coronary artery disease. *Am J Cardiol*. 2000;85:269-272.
412. Rosano GM, Leonardo F, Pagnotta P, et al. Acute anti-ischemic effect of testosterone in men with coronary artery disease. *Circulation*. 1999;99:1666-1670.

413. Schiavi RC, White D, Mandeli J, Levine AC. Effect of testosterone administration on sexual behavior and mood in men with erectile dysfunction. *Arch Sex Behav*. 1997;26:231–241.
414. Sigler LH, Tulgan J. Treatment of angina pectoris by testosterone propionate. *NY State J Med*. 1943;43:1424–1428.
415. Sih R, Morley JE, Kaiser FE, Perry HM III, Patrick P, Ross C. Testosterone replacement in older hypogonadal men: a 12-month randomized controlled trial. *J Clin Endocrinol Metab*. 1997;82:1661–1667.
416. Snyder PJ, Peachey H, Hannoush P, et al. Effect of testosterone treatment on bone mineral density in men over 65 years of age. *J Clin Endocrinol Metab*. 1999;84:1966–1972.
417. Snyder PJ, Peachey H, Hannoush P, et al. Effect of testosterone treatment on body composition and muscle strength in men over 65 years of age. *J Clin Endocrinol Metab*. 1999;84:2647–2653.
418. Tenover JS. Effects of testosterone supplementation in the aging male. *J Clin Endocrinol Metab*. 1992;75:1092–1098.
419. Tenover JS. Effect of testosterone (T) and 5 $\alpha$ -reductase inhibitor (5-ARI) administration on the responses to a sexual function questionnaire in older men [abstract]. *Proceedings of the American Society of Andrology 17th Annual Meeting; March 27–30, 1992; Bethesda, MD*. Philadelphia, PA: J.B. Lippincott Company; 1992:P-50. Abstract 129.
420. Uyanik BS, Ari Z, Gumus B, Yigitoglu MR, Arslan T. Beneficial effects of testosterone undecanoate on the lipoprotein profiles in healthy elderly men. A placebo controlled study. *Jpn Heart J*. 1997;38:73–82.
421. Webb CM, Adamson DL, de Zeigler D, Collins P. Effect of acute testosterone on myocardial ischemia in men with coronary artery disease. *Am J Cardiol*. 1999;83:437–439.
422. Webb CM, McNeill JG, Hayward CS, de Zeigler D, Collins P. Effects of testosterone on coronary vasomotor regulation in men with coronary heart disease. *Circulation*. 1999;100:1690–1696.
423. Wolf OT, Preut R, Hellhammer DH, Kudielka BM, Schurmeyer TH, Kirschbaum C. Testosterone and cognition in elderly men: a single testosterone injection blocks the practice effect in verbal fluency, but has no effect on spatial or verbal memory. *Biol Psychiatry*. 2000;47:650–654.
424. Tenover JS. Testosterone for all? *Proceedings of The Endocrine Society 80th Annual Meeting; June 24–27, 1998; New Orleans, LA*. Bethesda, MD: The Endocrine Society; 1998:24. Abstract S28-22.
425. Urban RJ, Bodenbun YH, Gilkison C, et al. Testosterone administration to elderly men increases skeletal muscle strength and protein synthesis. *Am J Physiol*. 1995;269:E820–E826.
426. Peacock M, Liu G, Carey M, et al. Effect of calcium or 25OH vitamin D3 dietary supplementation on bone loss at the hip in men and women over the age of 60. *J Clin Endocrinol Metab*. 2000;85:3011–3019.
427. Hajjar RR, Kaiser FE, Morley JE. Outcomes of long-term testosterone replacement in older hypogonadal males: a retrospective analysis. *J Clin Endocrinol Metab*. 1997;82:3793–3796.
428. Wu SZ, Weng XZ. Therapeutic effects of an androgenic preparation on myocardial ischemia and cardiac function in 62 elderly male coronary heart disease patients. *Chin Med J (Engl)*. 1993;106:415–418.
429. Matsumoto AM, Sandblom RE, Schoene RB, et al. Testosterone replacement in hypogonadal men: effects on obstructive sleep apnoea, respiratory drives, and sleep. *Clin Endocrinol (Oxf)*. 1985;22:713–721.
430. Schneider BK, Pickett CK, Zwillich CW, et al. Influence of testosterone on breathing during sleep. *J Appl Physiol*. 1986;61:618–623.
431. Grunstein RR, Handelsman DJ, Lawrence SJ, Blackwell C, Caterson ID, Sullivan CE. Neuroendocrine dysfunction in sleep apnea: reversal by continuous positive airways pressure therapy. *J Clin Endocrinol Metab*. 1989;68:352–358.
432. Santamaria JD, Prior JC, Fleetham JA. Reversible reproductive dysfunction in men with obstructive sleep apnoea. *Clin Endocrinol (Oxf)*. 1988;28:461–470.
433. Johns MW. A new method for measuring daytime sleepiness: the Epworth Sleepiness Scale. *Sleep*. 1991;14:540–545.
434. Johns MW. Reliability and factor analysis of the Epworth Sleepiness Scale. *Sleep*. 1992;15:376–381.
435. Johns MW. Daytime sleepiness, snoring, and obstructive sleep apnea. The Epworth Sleepiness Scale. *Chest*. 1993;103:30–36.
436. Netzer NC, Stoohs RA, Netzer CM, Clark K, Strohl KP. Using the Berlin Questionnaire to identify patients at risk for the sleep apnea syndrome. *Ann Intern Med*. 1999;131:485–491.
437. Gann PH, Hennekens CH, Longcope C, Verhoek-Oftedahl W, Grodstein F, Stampfer MJ. A prospective study of plasma hormone levels, nonhormonal factors, and development of benign prostatic hyperplasia. *Prostate*. 1995;26:40–49.
438. Hulka BS, Hammond JE, DiFerdinando G, et al. Serum hormone levels among patients with prostatic carcinoma or benign prostatic hyperplasia and clinic controls. *Prostate*. 1987;11:171–182.
439. Partin AW, Oesterling JE, Epstein JI, Horton R, Walsh PC. Influence of age and endocrine factors on the volume of benign prostatic hyperplasia. *J Urol*. 1991;145:405–409.
440. Drinka PJ, Voeks S, Bauwens S, Binkley N. Sensitivity and positive predictive value of clinical signs of hypogonadism in elderly men. *South Med J*. 1993;86:1264–1265.
441. Greenblatt RB, Nezhat C, Roesel RA, Natrajan PK. Update on the male and female climacteric. *J Am Geriatr Soc*. 1979;27:481–490.
442. Wu CY, Yu TJ, Chen MJ. Age related testosterone level changes and male andropause syndrome. *Changeng Yi Xue Za Zhi*. 2000;23:348–353.
443. Morales A, Bain J, Ruijs A, Chapdelaine A, Tremblay RR. Clinical practice guidelines for screening and monitoring male patients receiving testosterone supplementation therapy. *Int J Impot Res*. 1996;8:95–97.
444. Smith KW, Feldman HA, McKinlay JB. Construction and field validation of a self-administered screener for testosterone deficiency (hypogonadism) in ageing men. *Clin Endocrinol (Oxf)*. 2000;53:703–711.
445. Klee GG, Hesser DW. Techniques to measure testosterone in the elderly. *Mayo Clin Proc*. 2000;75:S19–S25.
446. Swerdloff RS, Blackman MR, Cunningham GR, et al. *Summary of the Consensus Session from the 1st Annual Andropause Consensus 2000 Meeting*. Bethesda, MD: The Endocrine Society; 2000:1–6.
447. Spratt DI, O'Dea LS, Schoenfeld D, Butler J, Rao PN, Crowley WF Jr. Neuroendocrine-gonadal axis in men: frequent sampling of LH, FSH, and testosterone. *Am J Physiol*. 1988;254:E658–E666.
448. Citron JT, Ettinger B, Rubinoff H, et al. Prevalence of hypothalamic-pituitary imaging abnormalities in impotent men with secondary hypogonadism. *J Urol*. 1996;155:529–533.
449. Bhasin S, Buckwalter JG. Testosterone supplementation in older men: a rational idea whose time has not yet come. *J Androl*. 2001;22:718–731.
450. Basaria S, Dobs AS. Hypogonadism and androgen replacement therapy in elderly men. *Am J Med*. 2001;110:563–572.
451. Morley JE. Androgens and aging. *Maturitas*. 2001;38:61–71; discussion 71–73.
452. Tenover JL. Testosterone replacement therapy in older adult men. *Int J Androl*. 1999;22:300–306.
453. Vermeulen A. Androgen replacement therapy in the aging male—a critical evaluation. *J Clin Endocrinol Metab*. 2001;86:2380–2390.
454. Tremblay RR, Morales A. Canadian practice recommendations for screening, monitoring and treating men affected by andropause or partial androgen deficiency. *The Aging Male*. 1998;1:213–218.
455. Bhasin S, Bremner WJ. Clinical review 85: emerging issues in androgen replacement therapy. *J Clin Endocrinol Metab*. 1997;82:3–8.
456. Matsumoto AM. Clinical use and abuse of androgens and antiandrogens. In: Becker KL, ed. *Principles and Practice of Endocrinology and Metabolism*, 3rd edition. Philadelphia, PA: Lippincott Williams & Wilkins; 2001:1181–1200.
457. Snyder PJ, Lawrence DA. Treatment of male hypogonadism with testosterone enanthate. *J Clin Endocrinol Metab*. 1980;51:1335–1339.
458. Ellyin FM, Gall EP, Akbar A, Paclibare LV. The safety and beneficial effects of low dose testosterone in the aging male hormone replacement. *Proceedings of The Endocrine Society 83rd Annual Meeting; June 20–23, 2001; Denver, CO*. Bethesda, MD: The Endocrine Society; 2001:240. Abstract P241-430.
459. Amory JK, Matsumoto AM. The therapeutic potential of testosterone patches. *Expert Opin Invest Drugs*. 1998;7:1977–1988.
460. McClellan KJ, Goa KL. Transdermal testosterone. *Drugs*. 1998;55:253–258; discussion 259.
461. Bennett NJ. A burn-like lesion caused by a testosterone transdermal system. *Burns*. 1998;24:478–480.



462. Buckley DA, Wilkinson SM, Higgins EM. Contact allergy to a testosterone patch. *Contact Dermatitis*. 1998;39:91–92.
463. Dobs AS, Bachorik PS, Arver S, et al. Interrelationships among lipoprotein levels, sex hormones, anthropometric parameters, and age in hypogonadal men treated for 1 year with a permeation-enhanced testosterone transdermal system. *J Clin Endocrinol Metab*. 2001;86:1026–1033.
464. Wilson DE, Kaidbey K, Boike SC, Jorkasky DK. Use of topical corticosteroid pretreatment to reduce the incidence and severity of skin reactions associated with testosterone transdermal therapy. *Clin Ther*. 1998;20:299–306.
465. Yu Z, Gupta SK, Hwang SS, et al. Testosterone pharmacokinetics after application of an investigational transdermal system in hypogonadal men. *J Clin Pharmacol*. 1997;37:1139–1145.
466. Swerdloff RS, Wang C, Cunningham G, et al. Long-term pharmacokinetics of transdermal testosterone gel in hypogonadal men. *J Clin Endocrinol Metab*. 2000;85:4500–4510.
467. Wang C, Berman N, Longstreth JA, et al. Pharmacokinetics of transdermal testosterone gel in hypogonadal men: application of gel at one site versus four sites: a General Clinical Research Center Study. *J Clin Endocrinol Metab*. 2000;85:964–969.
468. Gooren LJ. A ten-year safety study of the oral androgen testosterone undecanoate. *J Androl*. 1994;15:212–215.
469. Cummings DE, Kumar N, Bardin CW, Sundaram K, Bremner WJ. Prostate-sparing effects in primates of the potent androgen 7 alpha-methyl-19-nortestosterone: a potential alternative to testosterone for androgen replacement and male contraception. *J Clin Endocrinol Metab*. 1998;83:4212–4219.
470. Kumar N, Didolkar AK, Monder C, Bardin CW, Sundaram K. The biological activity of 7 alpha-methyl-19-nortestosterone is not amplified in male reproductive tract as is that of testosterone. *Endocrinology*. 1992;130:3677–3683.
471. Anderson RA, Martin CW, Kung AW, et al. 7 Alpha-methyl-19-nortestosterone maintains sexual behavior and mood in hypogonadal men. *J Clin Endocrinol Metab*. 1999;84:3556–3562.
472. Carter HB. A PSA threshold of 4.0 ng/mL for early detection of prostate cancer: the only rational approach for men 50 years old and older. *Urology*. 2000;55:796–799.
473. Carter HB, Landis PK, Metter EJ, Fleisher LA, Pearson JD. Prostate-specific antigen testing of older men. *J Natl Cancer Inst*. 1999;91:1733–1737.
474. Curran MJ, Bihrl W III. Dramatic rise in prostate-specific antigen after androgen replacement in a hypogonadal man with occult adenocarcinoma of the prostate. *Urology*. 1999;53:423–424.
475. Carter HB, Pearson JD, Waclawiw Z, et al. Prostate-specific antigen variability in men without prostate cancer: effect of sampling interval on prostate-specific antigen velocity. *Urology*. 1995;45:591–596.

Received July 20, 2001

Accepted August 3, 2001

# Editor Nominations

## *The Gerontologist*

The Gerontological Society of America's Publications Committee is seeking nominations for the position of Editor-in-Chief of *The Gerontologist*, the Society's multidisciplinary journal.

The target start date is July 1, 2002. The Editor-in-Chief makes appointments to the journal's editorial board and develops policies in accord with the scope statement prepared by the Publications Committee and approved by Council (see *The Gerontologist's* General Information and Instructions to Authors). The Editor works with reviewers and has the final responsibility for the acceptance of articles for his/her journal. The editorship is a voluntary position. Candidates must be members of The Gerontological Society of America and dedicated to developing a premier scientific journal.

Nominations and applications may be made by self or others, but must be accompanied by the candidate's curriculum vitae and a statement of willingness to accept the position. **All nominations and applications must be received by March 15, 2002.** Nominations and applications should be sent to the GSA Publications Committee, Attn: Jennifer Campi, The Gerontological Society of America, 1030 15<sup>th</sup> Street, NW, Suite 250, Washington, DC 20005-1503.
